# Supplementary material for: Catalytic Behavior of Cobalt Complexes Bearing Pyridine–Oxime Ligands in Isoprene Polymerization
Source: MDPI journal article supplement (doi:10.3390/polym15244660), 2023-12-10
Supplement: s1 [file s1]

## *Supplementary Information*

# Catalytic Behavior of Cobalt Complexes Bearing Pyridine–oxime Ligands in Isoprene Polymerization

Yuanxu Du <sup>1,2,†</sup>, Shuo Gao <sup>1,†</sup>, Hui Ma <sup>1</sup>, Siqi Lu <sup>1</sup>, Zhenhua Zhang <sup>1,\*</sup> and Mengmeng Zhao <sup>1,\*</sup>

<sup>1</sup> School of Chemistry and Chemical Engineering, Linyi University, Linyi 276000, China;

202226100109@lyu.edu.cn (Y.D.); gaoshuo9802@163.com (S.G.);

maroumodisi@163.com (H.M.);

17866937745@163.com (S.L.);

<sup>2</sup> College of Agriculture and Forestry, Linyi University, Linyi 276000, China

\* Correspondence: zhangzhenhua@iccas.ac.cn (Z.Z.);

zhaomengmeng@lyu.edu.cn (M.Z.)

† These authors contributed equally to this work.

|                                         |    |
|-----------------------------------------|----|
| X-ray data for complex <b>Co2</b> ..... | 2  |
| NMR data for and polyisoprene.....      | 5  |
| GPC data for polyisoprene.....          | 21 |

## X-ray data for complex Co2

**Table S1.** Crystal data and structure refinement for complex **Co2**.

| Identification Code               | 211113a                                                                                                                   |
|-----------------------------------|---------------------------------------------------------------------------------------------------------------------------|
| Empirical formula                 | C <sub>14</sub> H <sub>16</sub> Cl <sub>2</sub> CoN <sub>4</sub> O <sub>2</sub>                                           |
| Formula weight                    | 402.14                                                                                                                    |
| Temperature                       | 298(2) K                                                                                                                  |
| Wavelength                        | 0.71073 Å                                                                                                                 |
| Crystal system, space group       | Monoclinic, C2/c                                                                                                          |
| Unit cell dimensions              | a = 16.4302(18) Å    alpha = 90 deg.<br>b = 7.8040(8) Å    beta = 114.920(6) deg.<br>c = 14.9001(15) Å    gamma = 90 deg. |
| Volume                            | 1732.6(3) Å <sup>3</sup>                                                                                                  |
| Z, Calculated density             | 4, 1.542 Mg/m <sup>3</sup>                                                                                                |
| Absorption coefficient            | 1.311 mm <sup>-1</sup>                                                                                                    |
| F(000)                            | 820                                                                                                                       |
| Crystal size                      | 0.13 × 0.07 × 0.04 mm <sup>3</sup>                                                                                        |
| Theta range for data collection   | 2.73 to 25.02 deg.                                                                                                        |
| Limiting indices                  | -19 ≤ h ≤ 17, -9 ≤ k ≤ 9, -15 ≤ l ≤ 17                                                                                    |
| Reflections collected / unique    | 2960/2960 [R(int) = 0.0000]                                                                                               |
| Completeness to theta = 25.02     | 97.1%                                                                                                                     |
| Absorption correction             | Semi-empirical from equivalents                                                                                           |
| Max. and min. transmission        | 0.9494 and 0.8480                                                                                                         |
| Refinement method                 | Full-matrix least-squares on F <sup>2</sup>                                                                               |
| Data / restraints / parameters    | 2960 / 608 / 214                                                                                                          |
| Goodness-of-fit on F <sup>2</sup> | 1.065                                                                                                                     |
| Final R indices [I>2sigma(I)]     | R1 = 0.1481, wR2 = 0.2869                                                                                                 |
| R indices (all data)              | R1 = 0.2954, wR2 = 0.3424                                                                                                 |
| Largest diff. peak and hole       | 1.258 and -1.730 e.Å <sup>3</sup>                                                                                         |

**Table S2.** Bond lengths for complex **Co2**.

| bond lengths (Å) |           |
|------------------|-----------|
| Co(1)-N(2)       | 2.098(16) |
| Co(1)-N(4)       | 2.132(16) |
| Co(1)-N(1)       | 2.188(17) |
| Co(1)-N(3)       | 2.219(16) |
| Co(1)-Cl(2)      | 2.455(6)  |
| Co(1)-Cl(1)      | 2.470(7)  |
| N(1)-C(6)        | 1.31(2)   |
| N(1)-C(2)        | 1.37(2)   |
| N(2)-C(1)        | 1.27(3)   |
| N(2)-O(1)        | 1.340(19) |
| N(3)-C(13)       | 1.35(2)   |
| N(3)-C(9)        | 1.43(2)   |
| N(4)-C(8)        | 1.29(2)   |
| N(4)-O(2)        | 1.39(2)   |

**Table S3.** Selected bond angles for complex **Co2**.

| selected bond angles (°) |           |                  |           |
|--------------------------|-----------|------------------|-----------|
| N(2)-Co(1)-N(4)          | 172.1(5)  | C(6)-N(1)-C(2)   | 113.1(18) |
| N(2)-Co(1)-N(1)          | 77.2(6)   | C(6)-N(1)-Co(1)  | 130.9(14) |
| N(4)-Co(1)-N(1)          | 109.6(6)  | C(2)-N(1)-Co(1)  | 114.4(13) |
| N(2)-Co(1)-N(3)          | 109.5(6)  | C(1)-N(2)-O(1)   | 116.5(16) |
| N(4)-Co(1)-N(3)          | 74.7(6)   | C(1)-N(2)-Co(1)  | 114.8(14) |
| N(1)-Co(1)-N(3)          | 94.0(4)   | O(1)-N(2)-Co(1)  | 128.1(12) |
| N(2)-Co(1)-Cl(2)         | 83.6(5)   | C(13)-N(3)-C(9)  | 117.9(16) |
| N(4)-Co(1)-Cl(2)         | 89.9(5)   | C(13)-N(3)-Co(1) | 130.7(12) |
| N(1)-Co(1)-Cl(2)         | 160.2(5)  | C(9)-N(3)-Co(1)  | 107.8(12) |
| N(3)-Co(1)-Cl(2)         | 87.7(4)   | C(8)-N(4)-O(2)   | 116.3(15) |
| N(2)-Co(1)-Cl(1)         | 90.6(5)   | C(8)-N(4)-Co(1)  | 121.0(15) |
| N(4)-Co(1)-Cl(1)         | 85.9(5)   | O(2)-N(4)-Co(1)  | 122.7(11) |
| N(1)-Co(1)-Cl(1)         | 86.5(5)   | N(2)-O(1)-H(1)   | 109.5     |
| N(3)-Co(1)-Cl(1)         | 159.6(5)  | N(4)-O(2)-H(2)   | 109.5     |
| Cl(2)-Co(1)-Cl(1)        | 98.68(15) | N(2)-C(1)-C(2)   | 120.9(19) |

## NMR data for polyisoprene

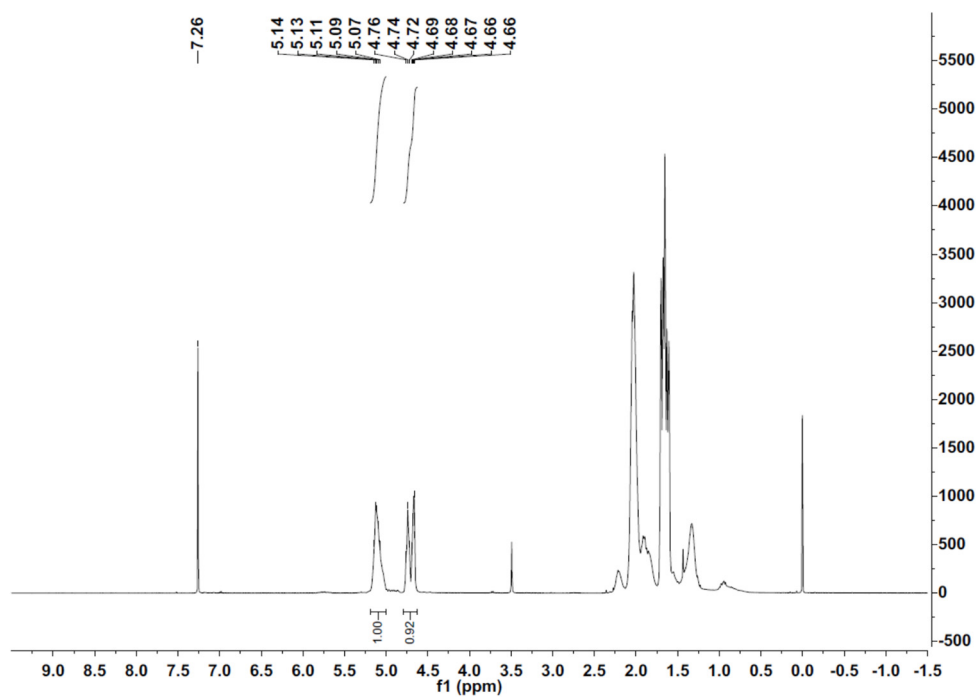

Figure S1. Table 1, entry 1 (<sup>1</sup>H MMR)

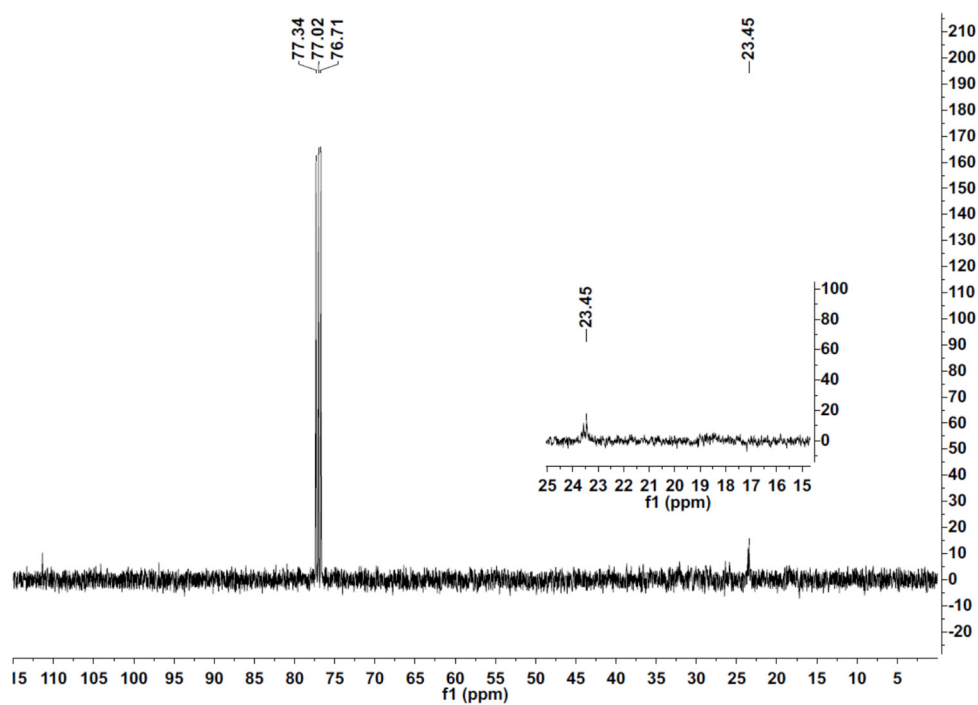

Figure S2. Table 1, entry 1 (<sup>13</sup>C MMR)

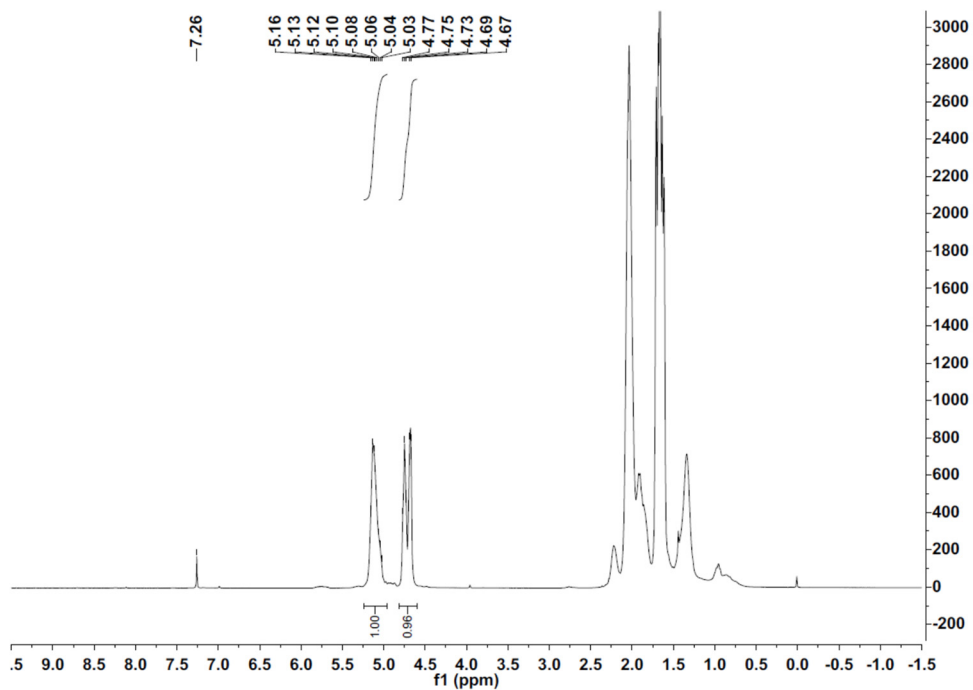

Figure S3. Table 1, entry 2 (<sup>1</sup>H MMR)

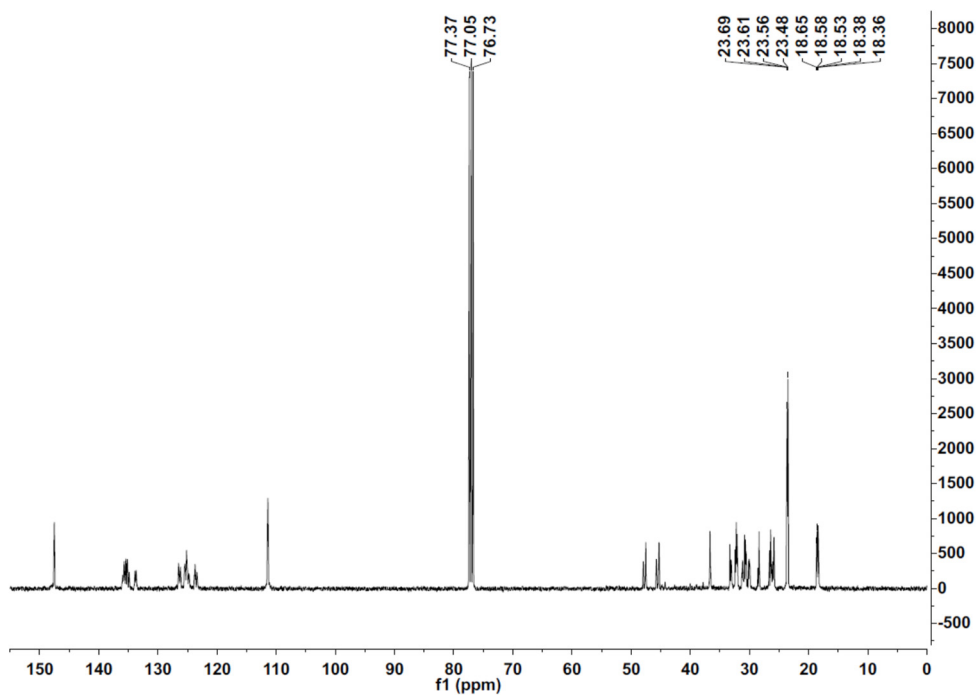

Figure S4. Table 1, entry 2 (<sup>13</sup>C MMR)

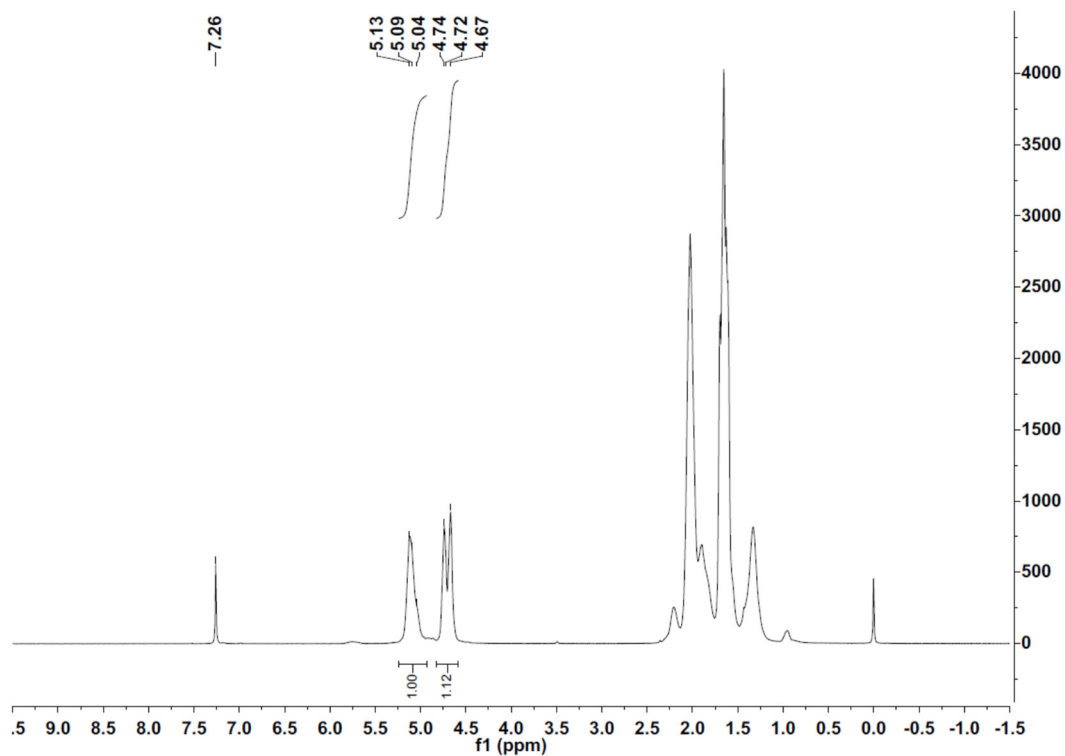

Figure S5. Table 1, entry 3 (<sup>1</sup>H MMR)

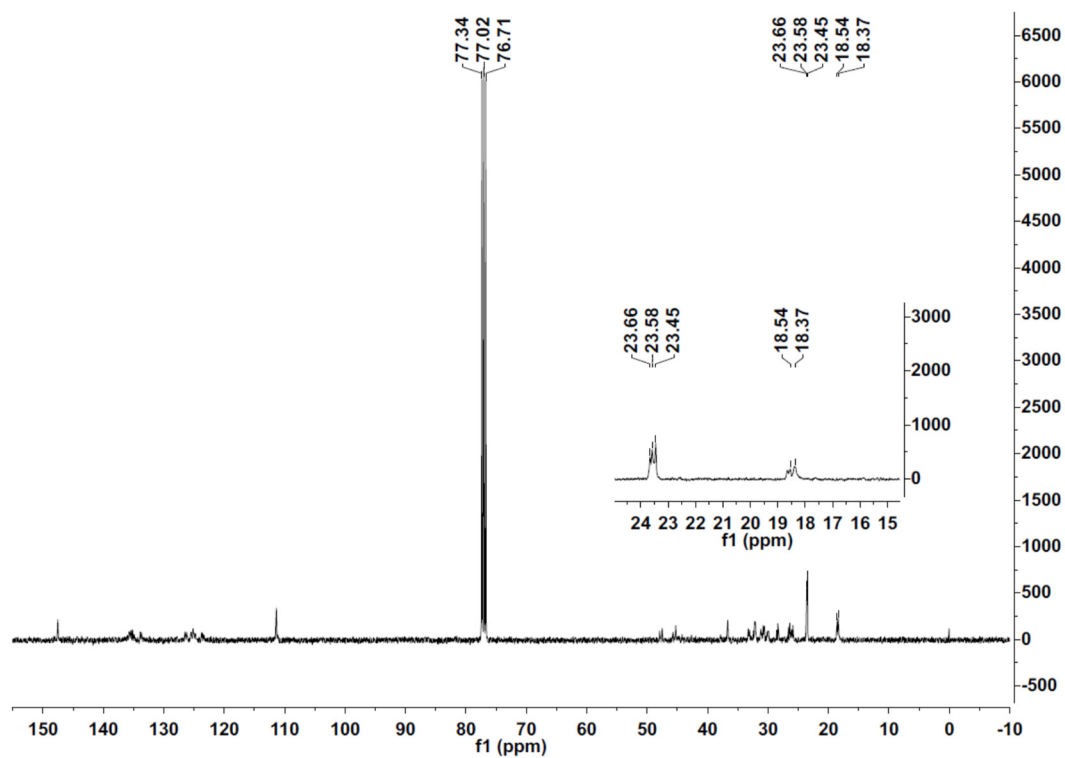

Figure S6. Table 1, entry 3 (<sup>13</sup>C MMR)

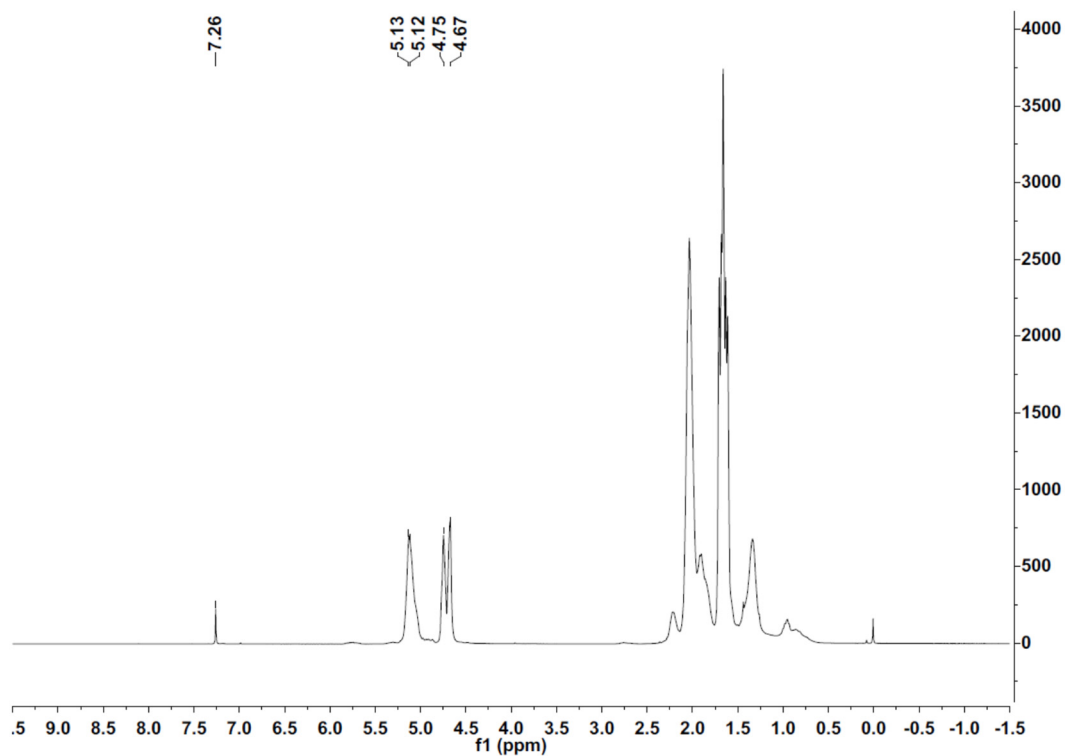

Figure S7. Table 1, entry 4 ( $^1\text{H}$  MMR)

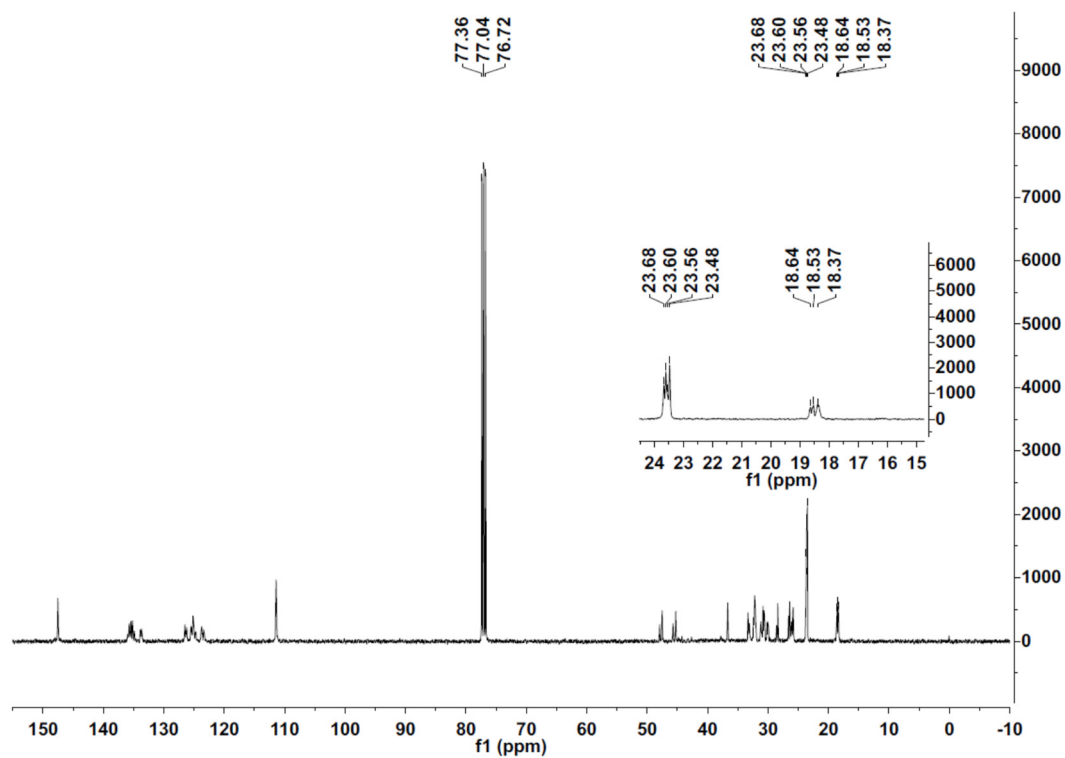

Figure S8. Table 1, entry 4 ( $^{13}\text{C}$  MMR)



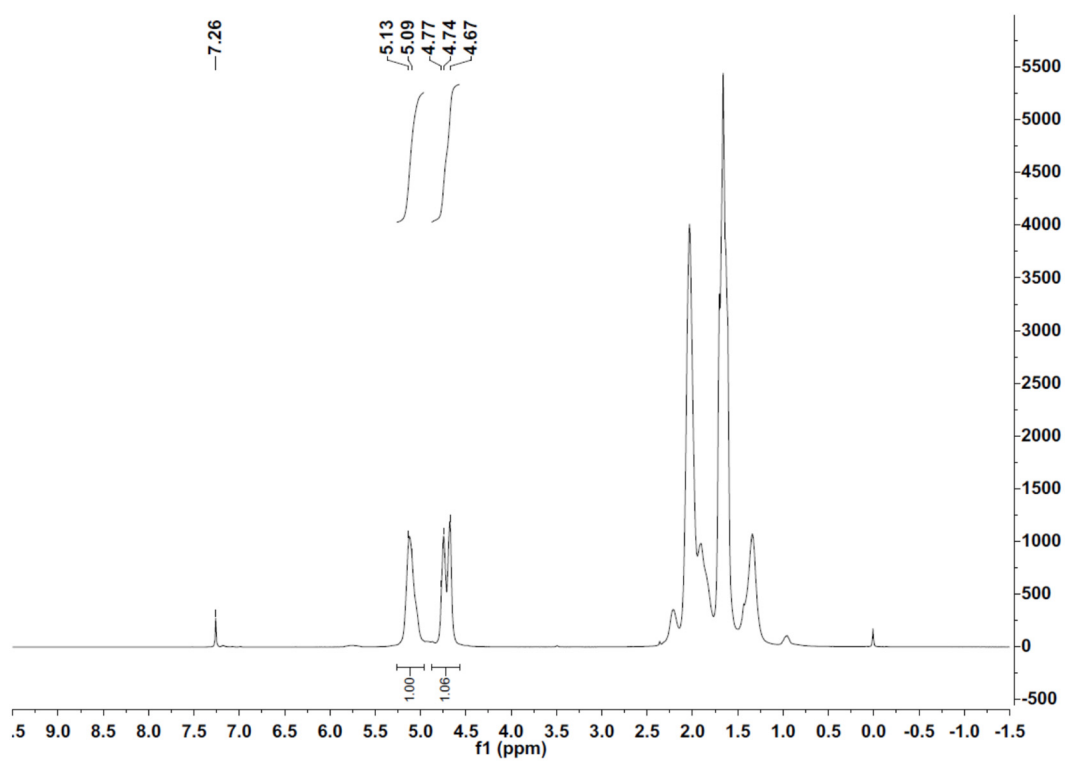

Figure S9. Table 2, entry 1 ( $^1\text{H}$  MMR)

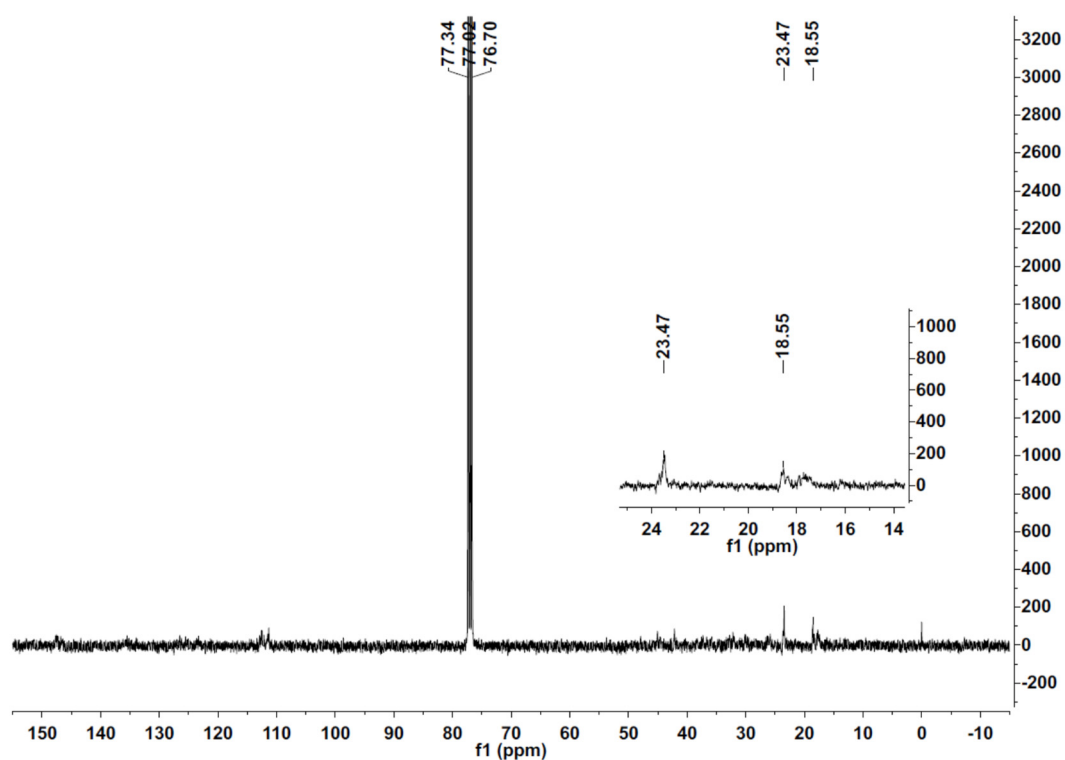

Figure S10. Table 2, entry 1 ( $^{13}\text{C}$  MMR)

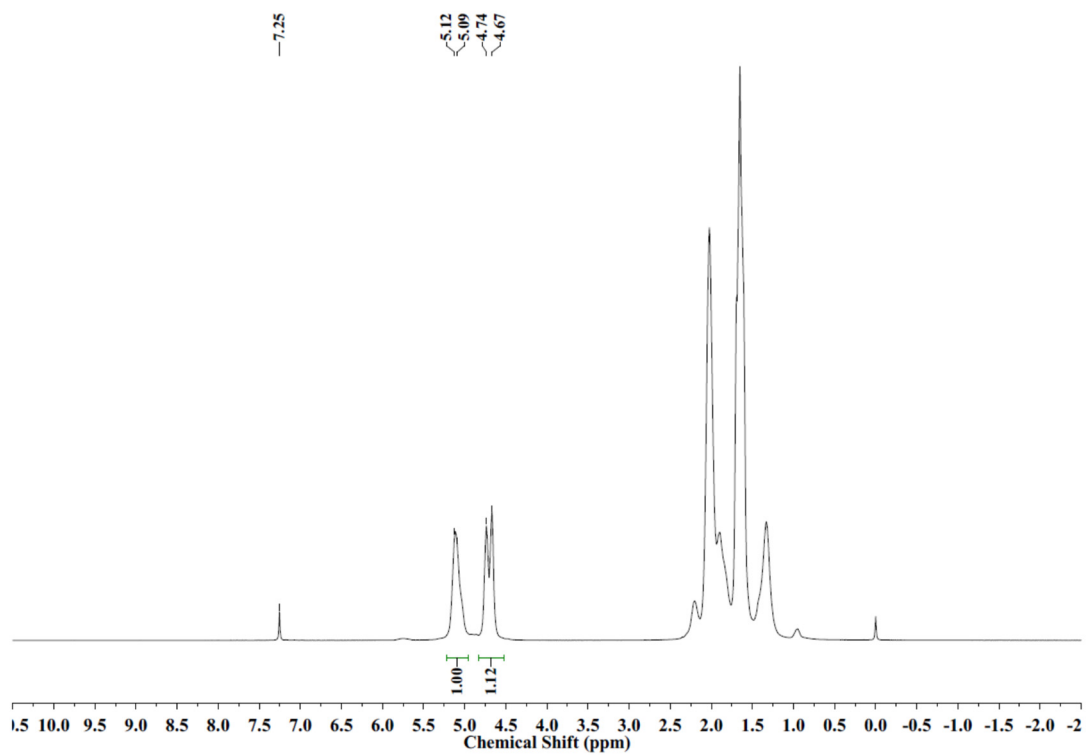

Figure S11. Table 2, entry 2 ( $^1\text{H}$  MMR)

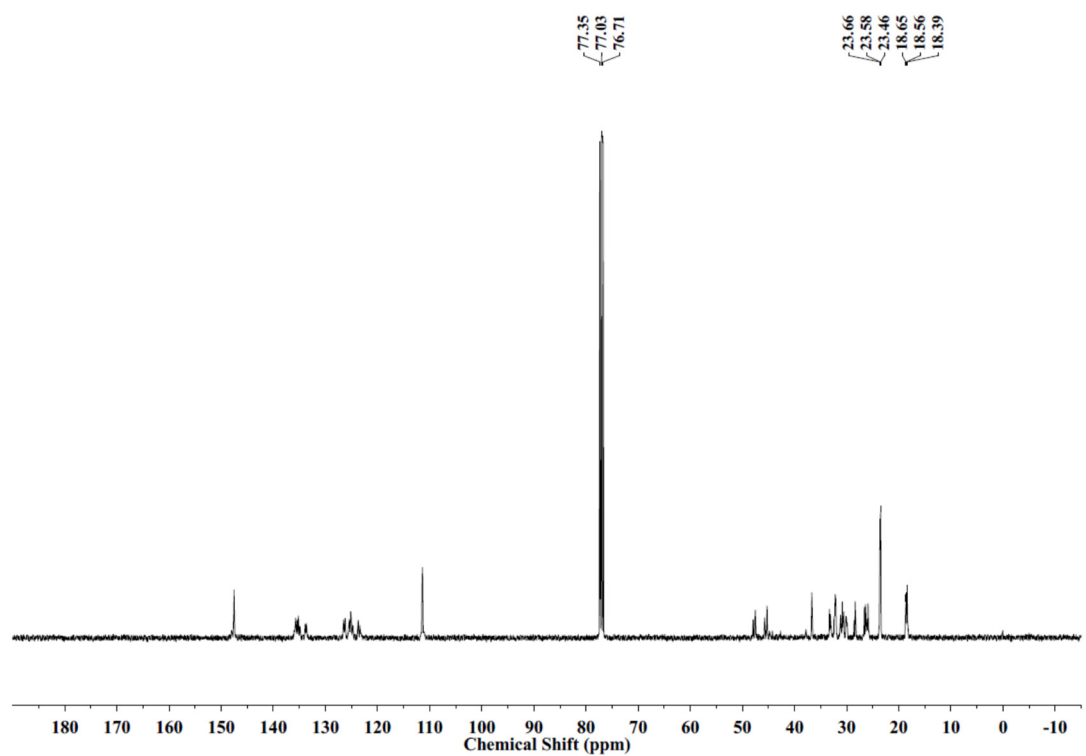

Figure S12. Table 2, entry 2 ( $^{13}\text{C}$  MMR)

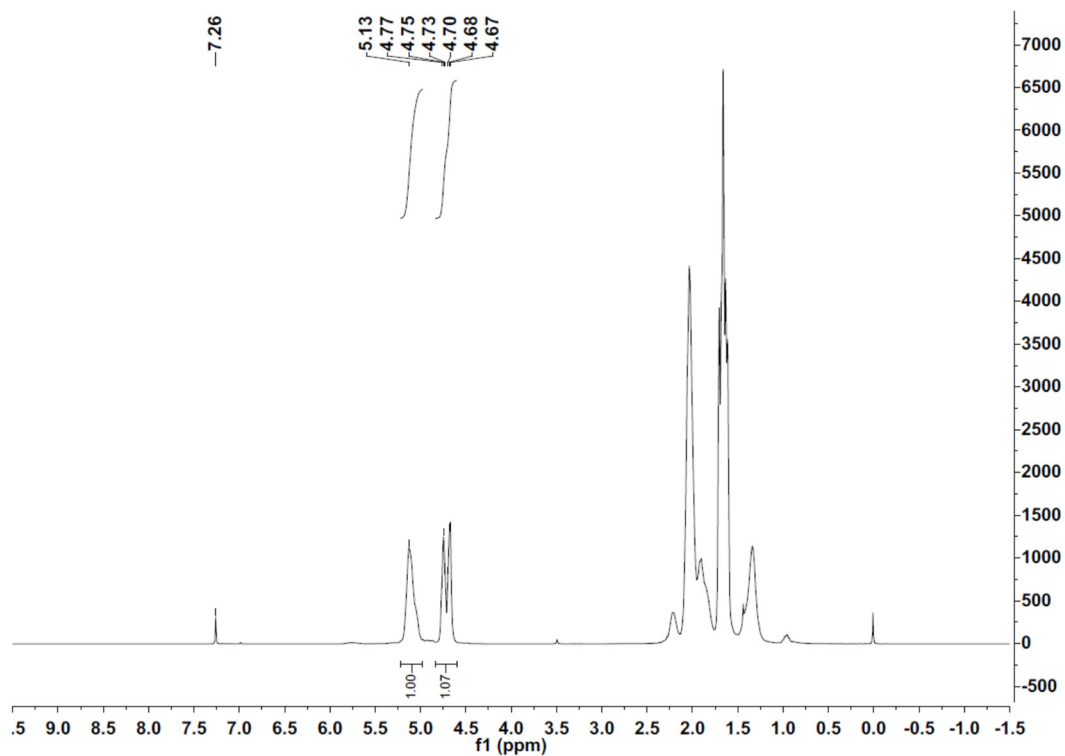

Figure S13. Table 2, entry 3 (<sup>1</sup>H MMR)

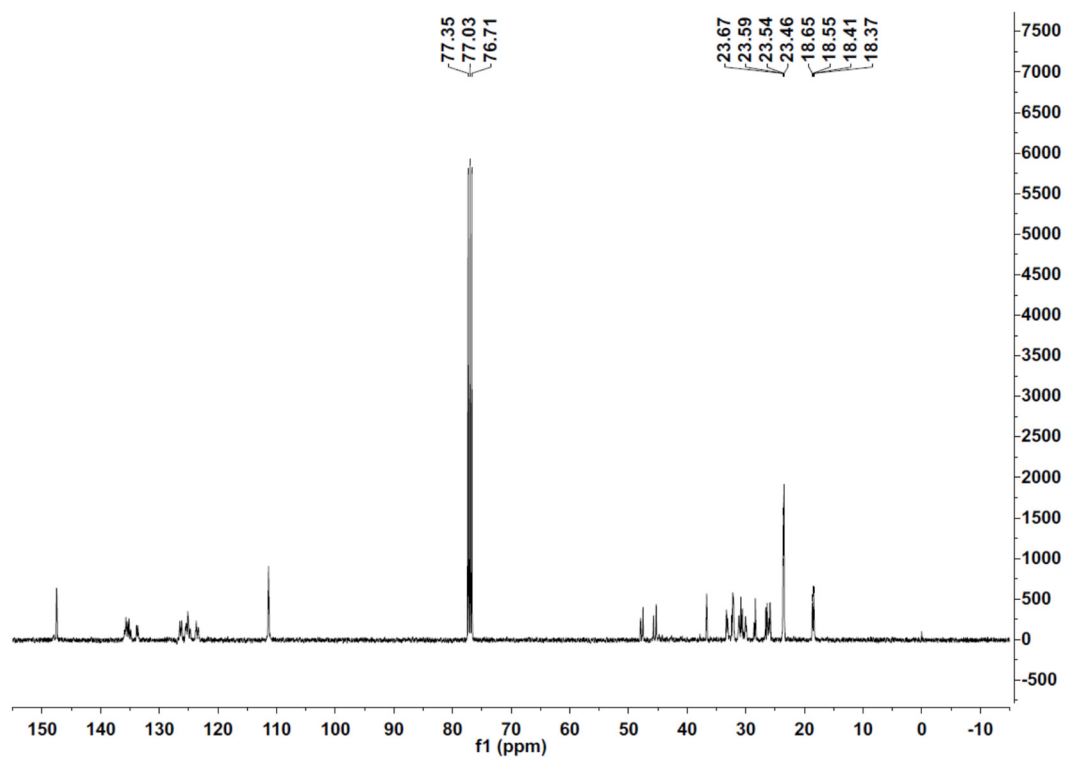

Figure S14. Table 2, entry 3 (<sup>13</sup>C MMR)

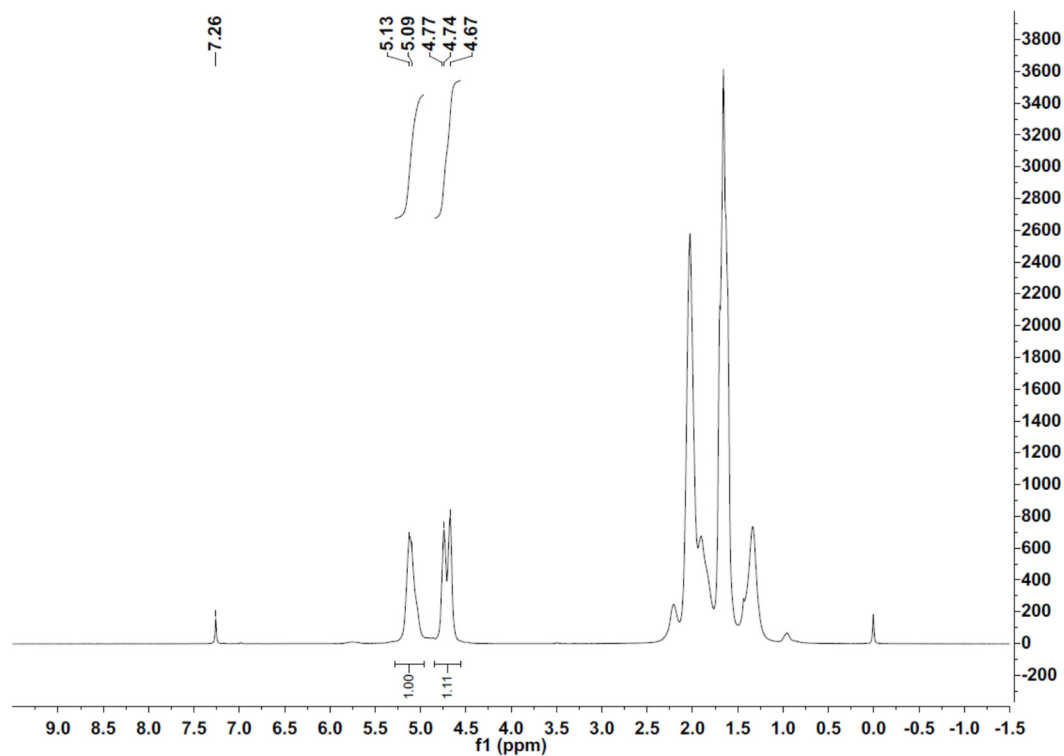

Figure S15. Table 2, entry 4 (<sup>1</sup>H MMR)

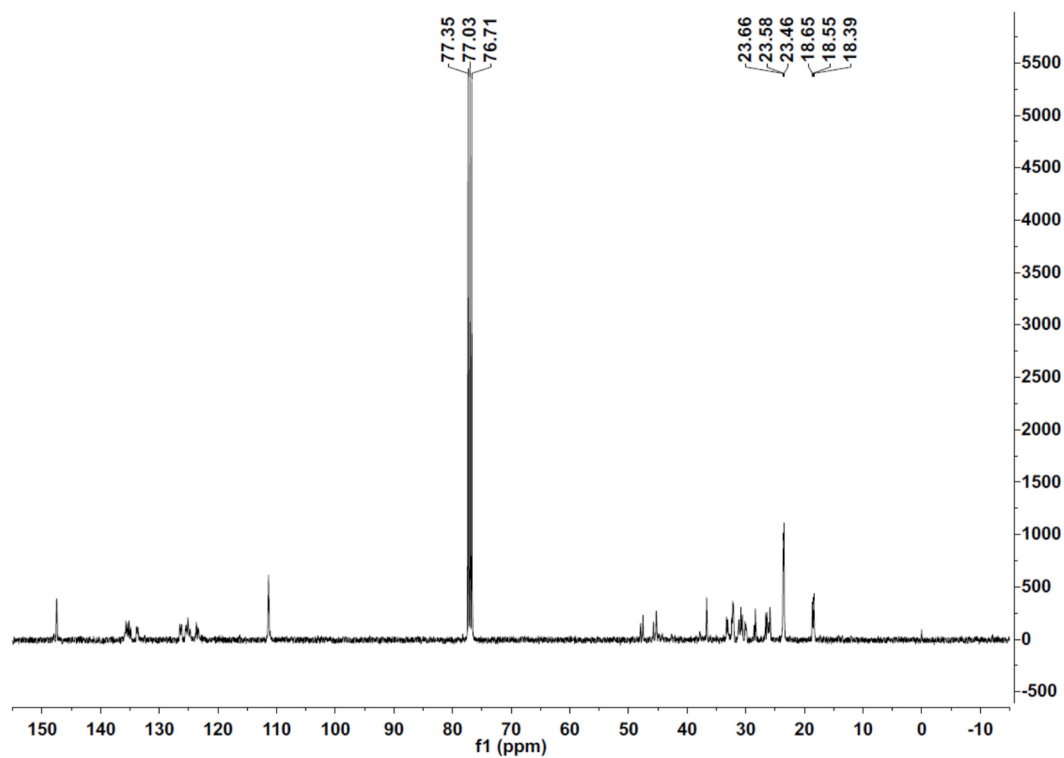

Figure S16. Table 2, entry 4 (<sup>13</sup>C MMR)

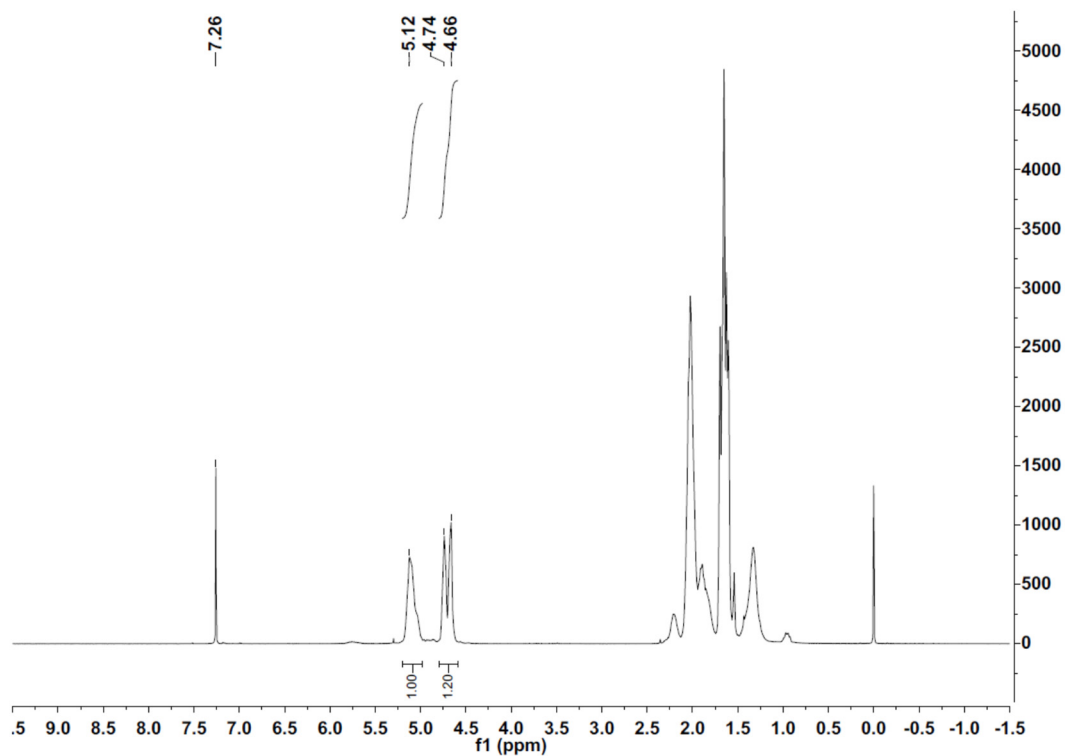

Figure S17. Table 2, entry 5 (<sup>1</sup>H MMR)

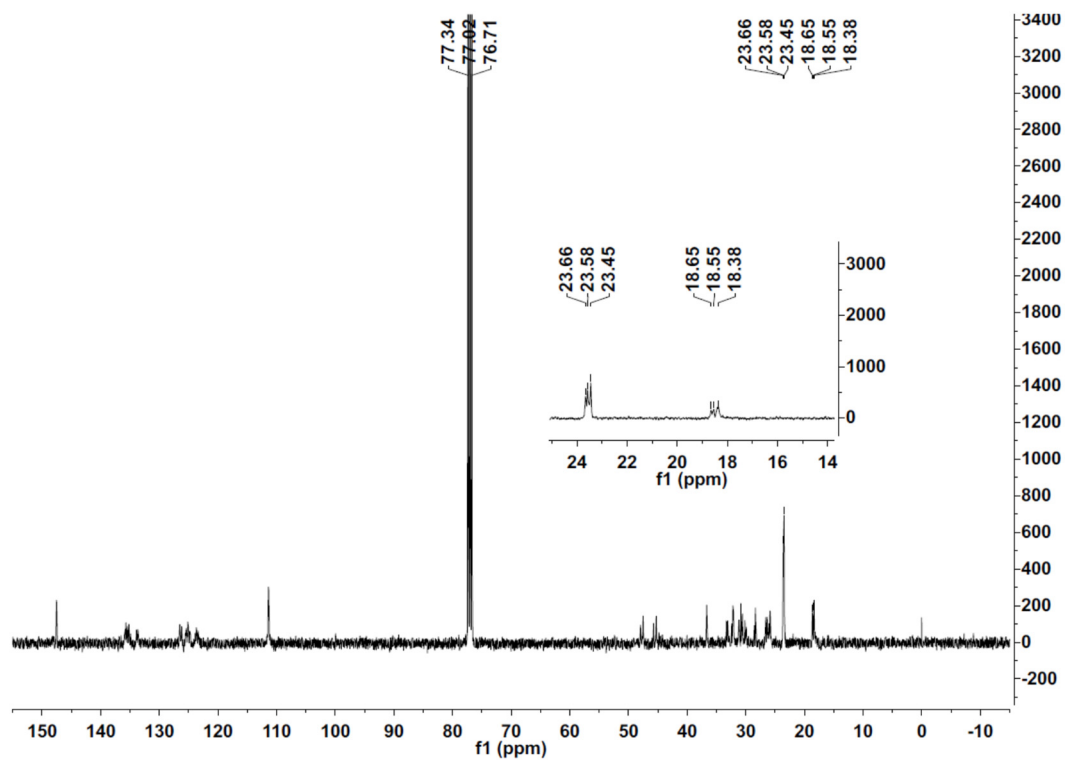

Figure S18. Table 2, entry 5 (<sup>13</sup>C MMR)

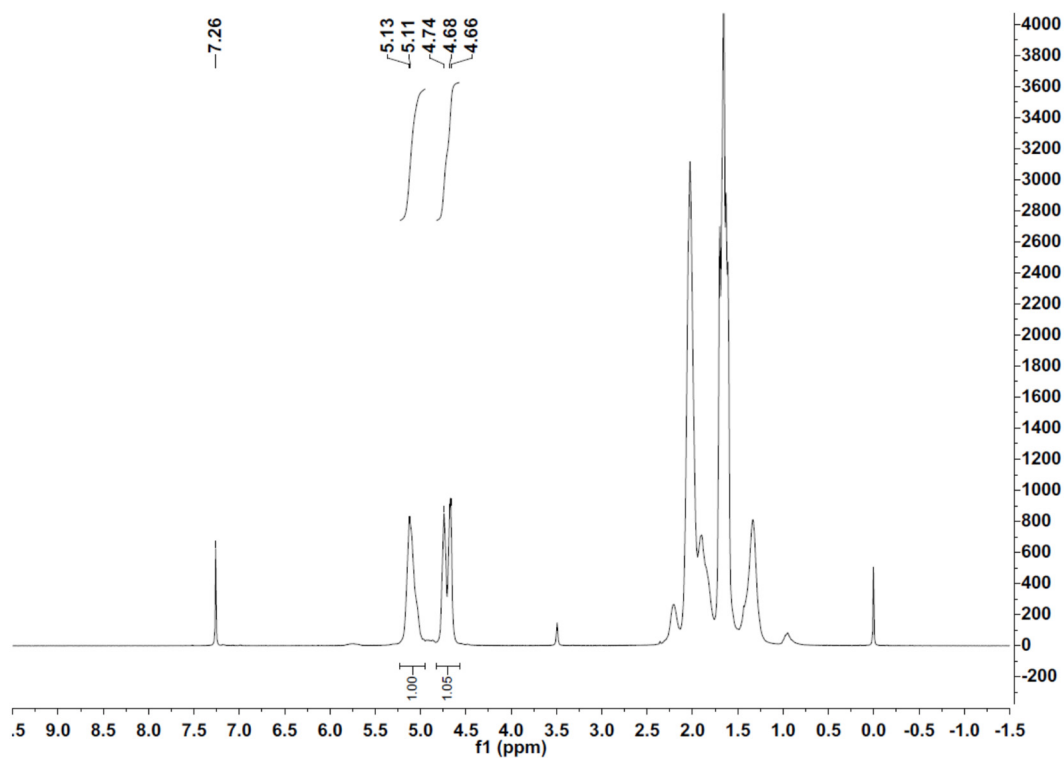

Figure S19. Table 2, entry 6 (<sup>1</sup>H MMR)

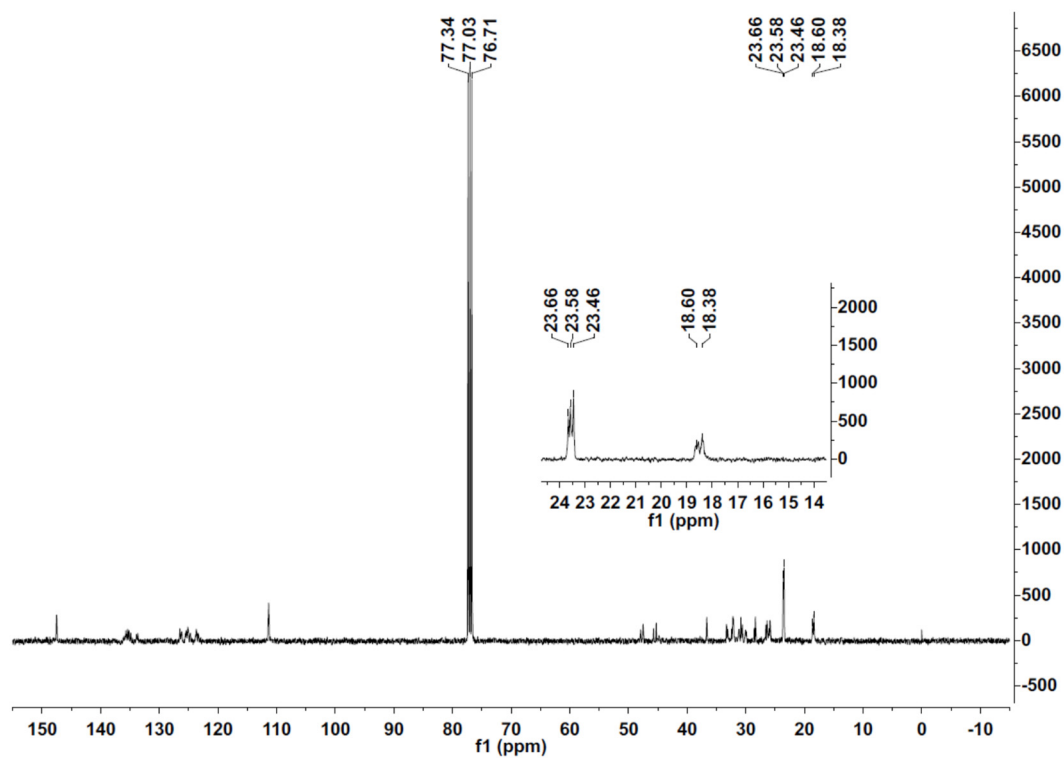

Figure S20. Table 2, entry 6 (<sup>13</sup>C MMR)

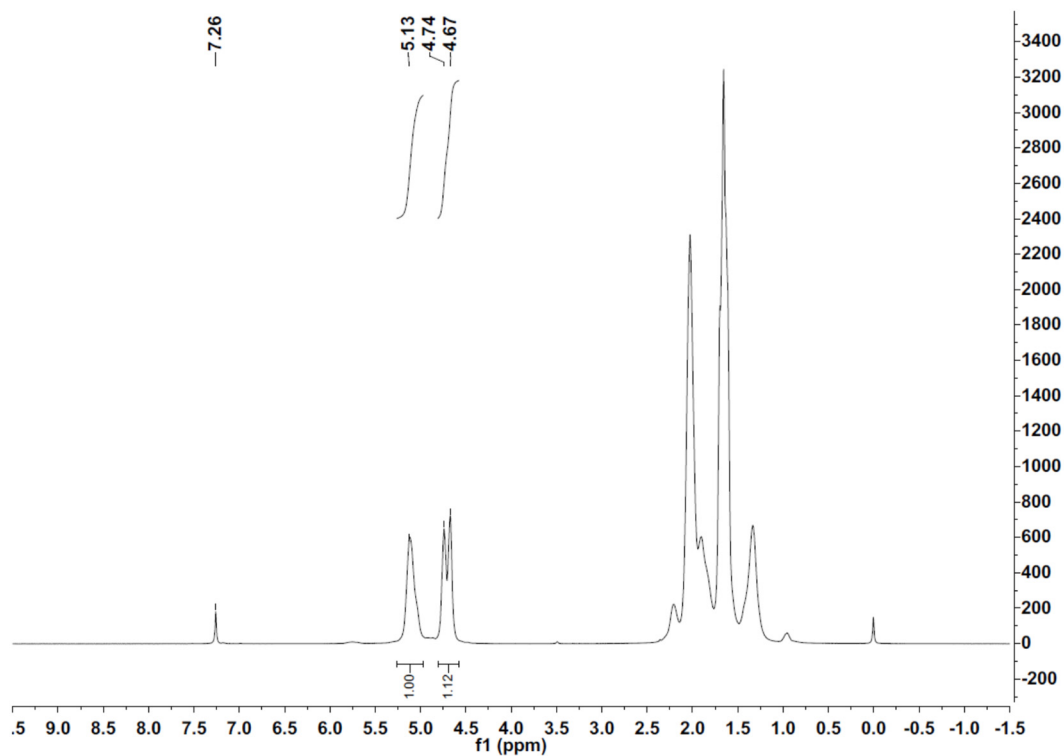

Figure S21. Table 2, entry 7 (<sup>1</sup>H MMR)

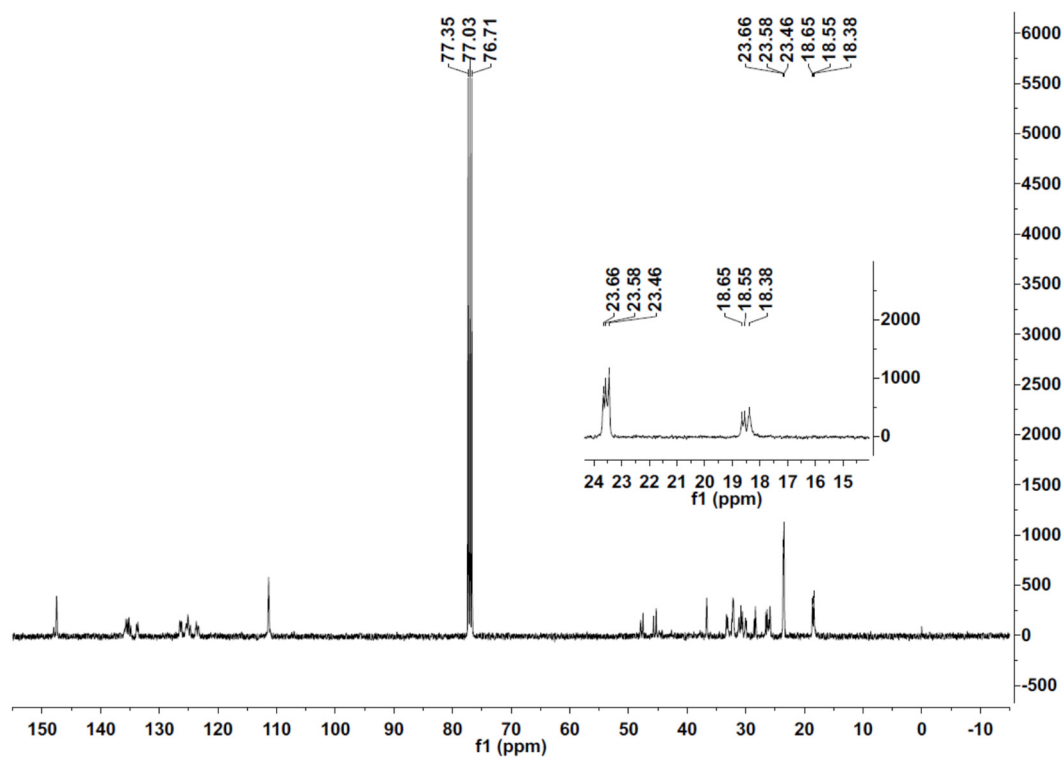

Figure S22. Table 2, entry 7 (<sup>13</sup>C MMR)

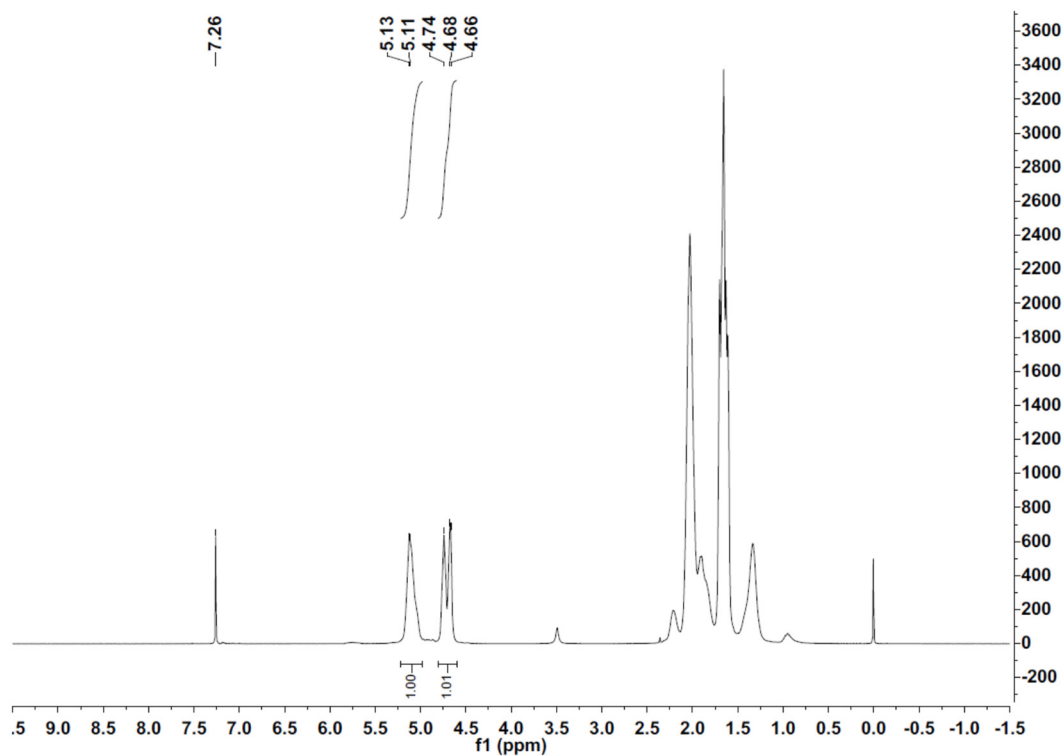

Figure S23. Table 2, entry 8 (<sup>1</sup>H MMR)

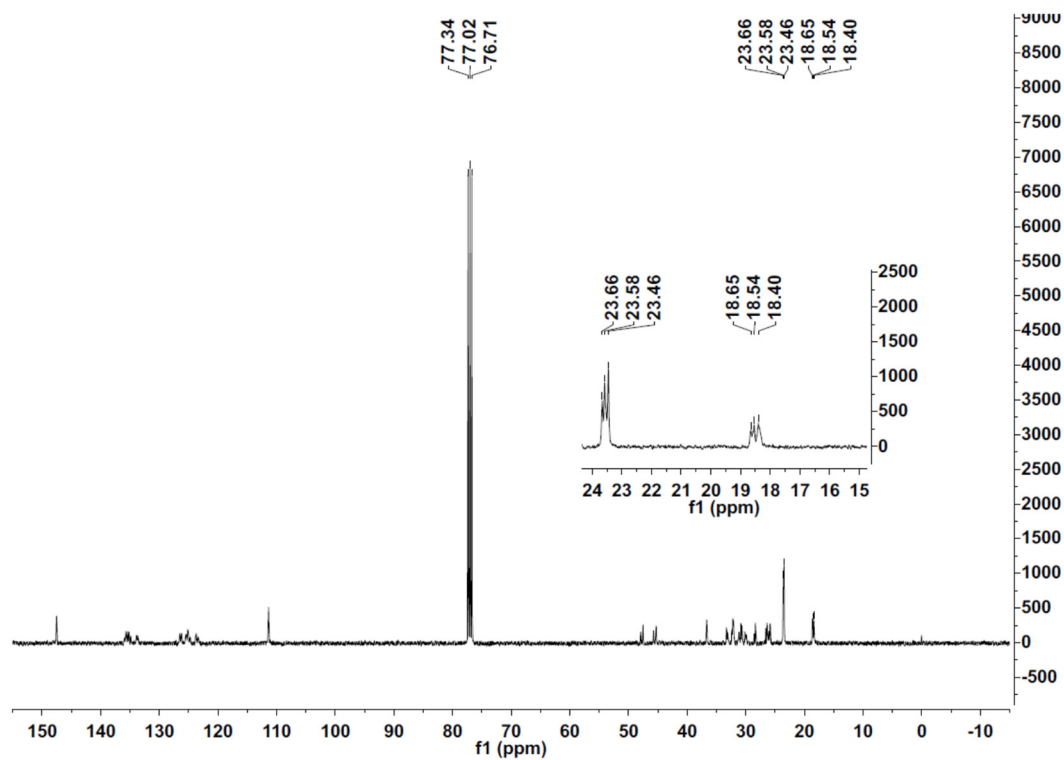

Figure S24. Table 2, entry 8 (<sup>13</sup>C MMR)



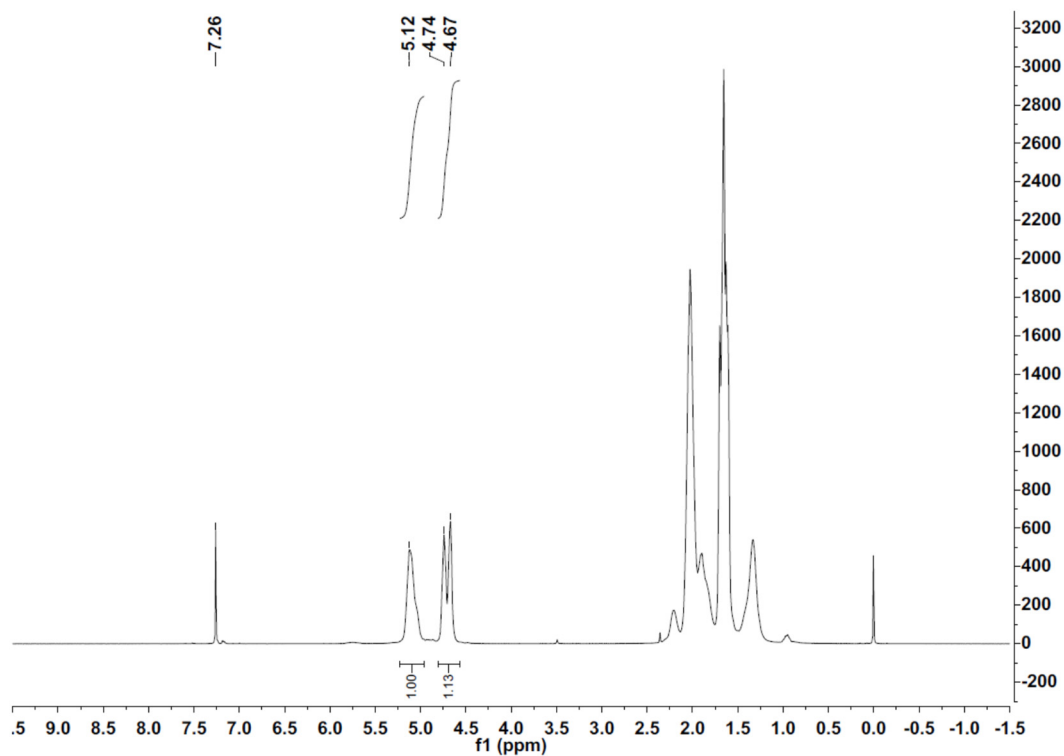

Figure S25. Table 2, entry 9 (<sup>1</sup>H MMR)

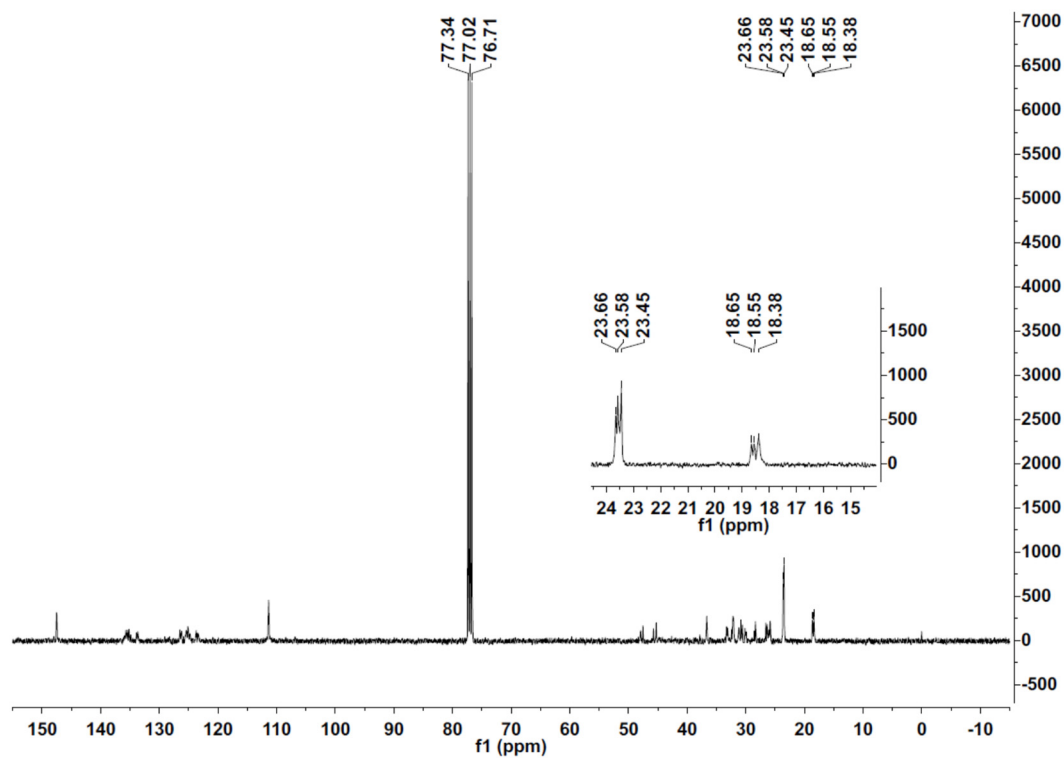

Figure S26. Table 2, entry 9 (<sup>13</sup>C MMR)

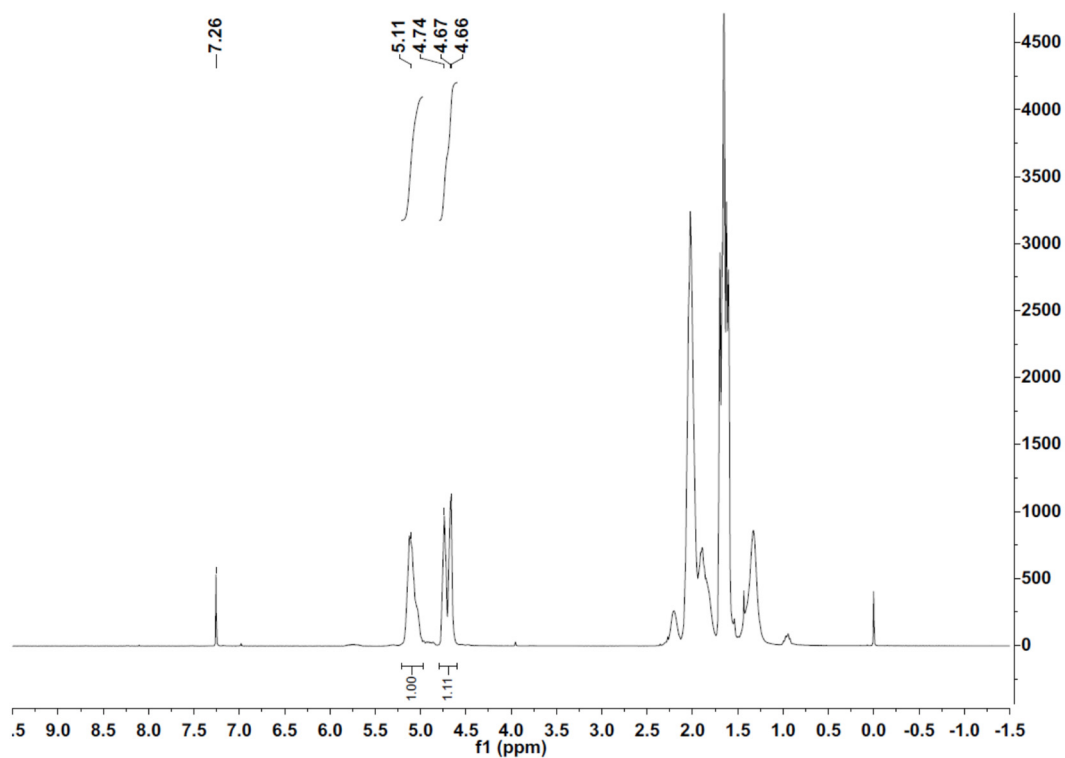

Figure S27. Table 3, entry 1 (<sup>1</sup>H MMR)

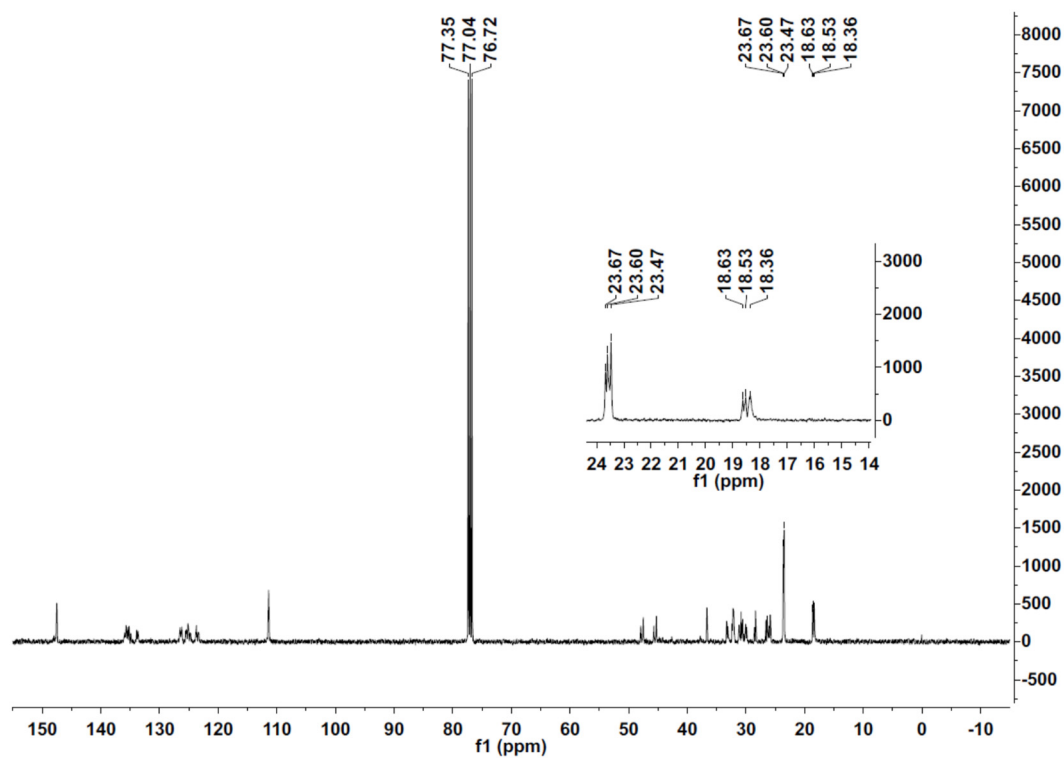

Figure S28. Table 3, entry 1 (<sup>13</sup>C MMR)

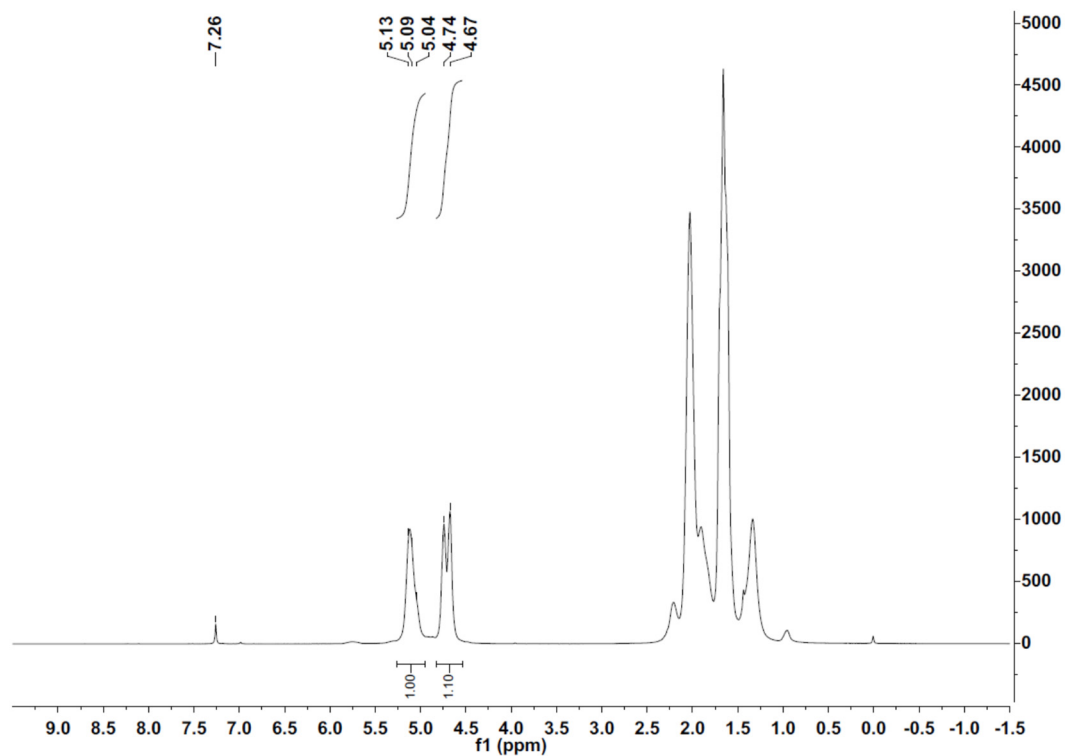

Figure S29. Table 3, entry 2 (<sup>1</sup>H MMR)

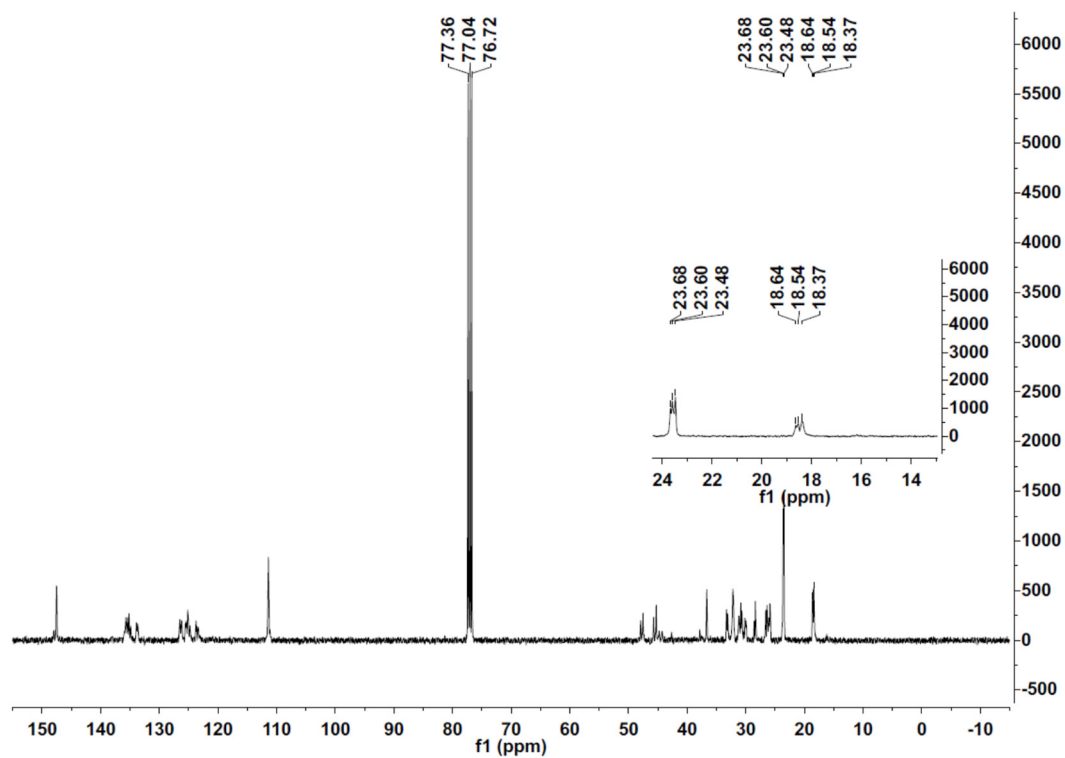

Figure S30. Table 3, entry 2 (<sup>13</sup>C MMR)

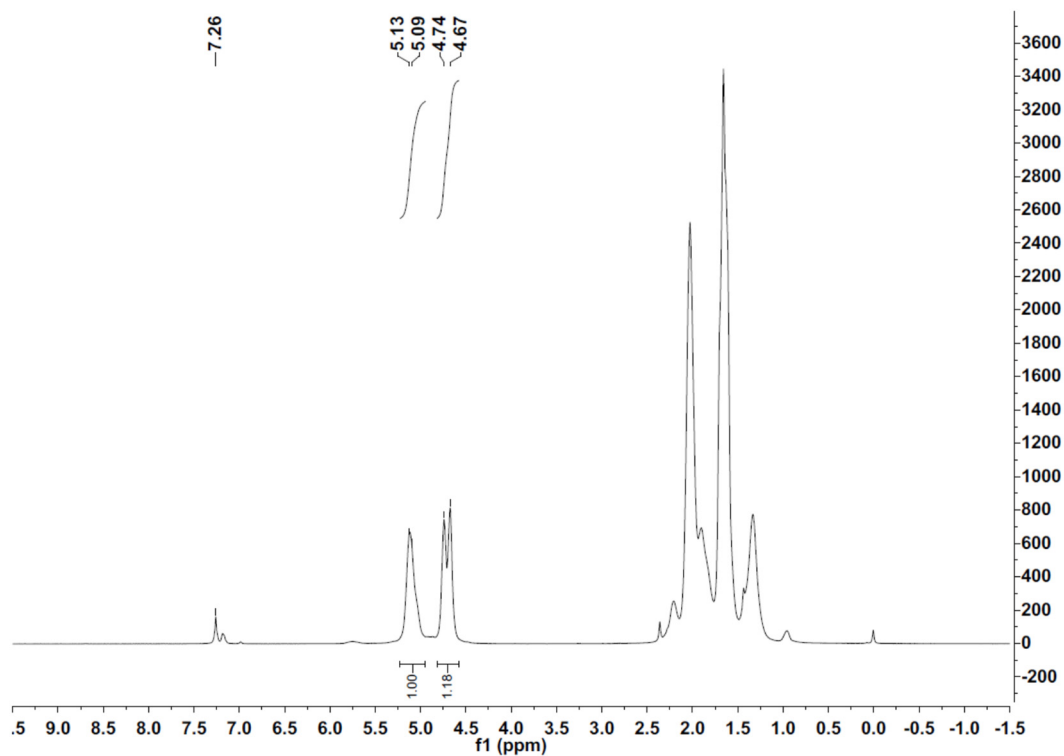

Figure S31. Table 3, entry 3 (<sup>1</sup>H MMR)

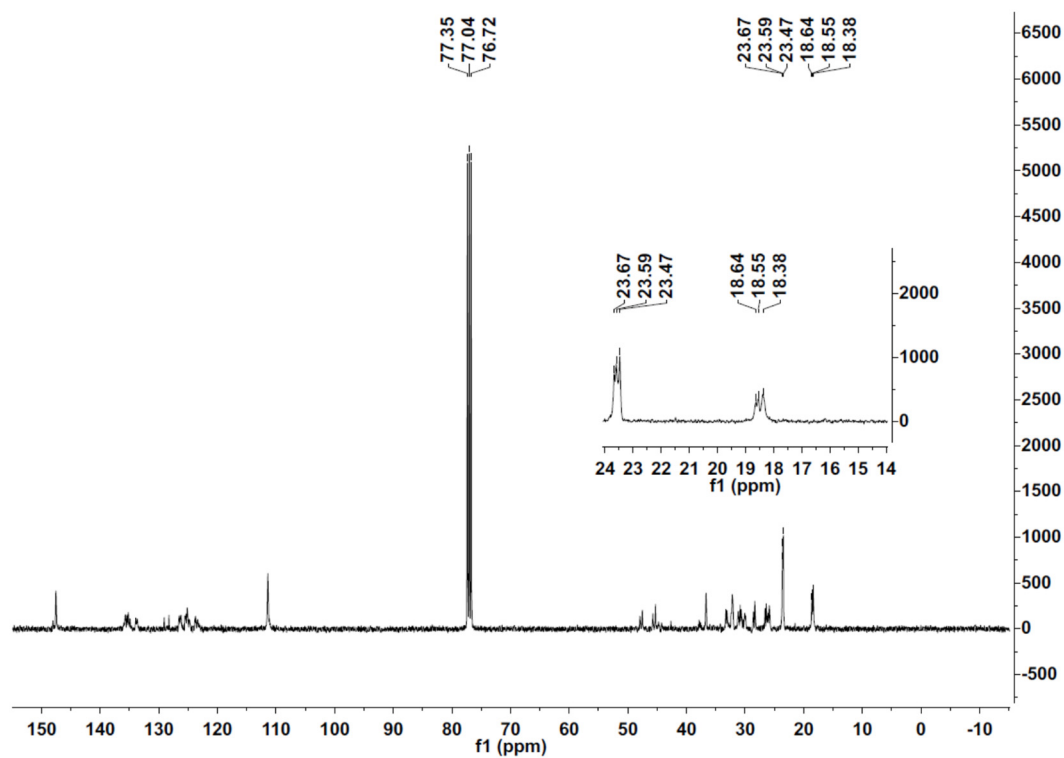

Figure S32. Table 3, entry 3 (<sup>13</sup>C MMR)

## GPC data for polyisoprene

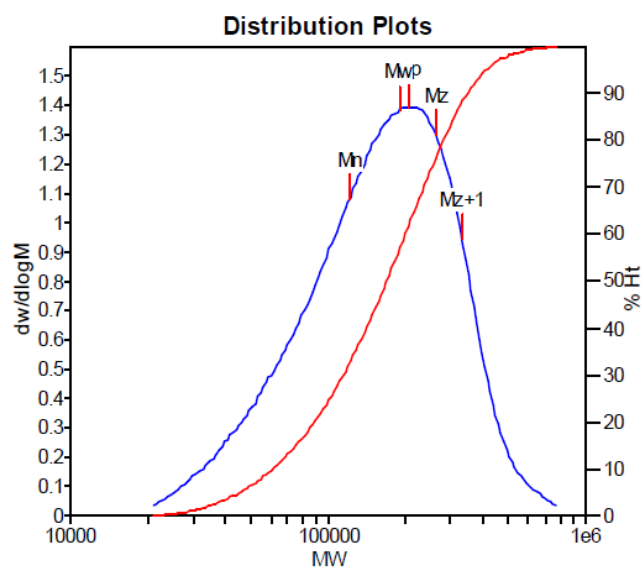

### MW Averages

| Peak No | $M_p$  | $M_n$  | $M_w$  | $M_z$  | $M_{z+1}$ | $M_v$  | PD      |
|---------|--------|--------|--------|--------|-----------|--------|---------|
| 1       | 205180 | 121676 | 189544 | 261957 | 332080    | 178213 | 1.55778 |

Figure S33. Table 1, entry 1

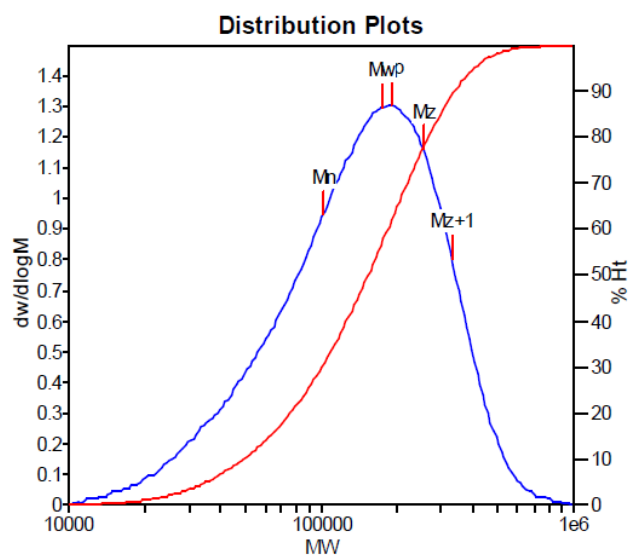

### MW Averages

| Peak No | $M_p$  | $M_n$  | $M_w$  | $M_z$  | $M_{z+1}$ | $M_v$  | PD      |
|---------|--------|--------|--------|--------|-----------|--------|---------|
| 1       | 190789 | 101829 | 176050 | 254572 | 330807    | 163831 | 1.72888 |

Figure S34. Table 1, entry 2

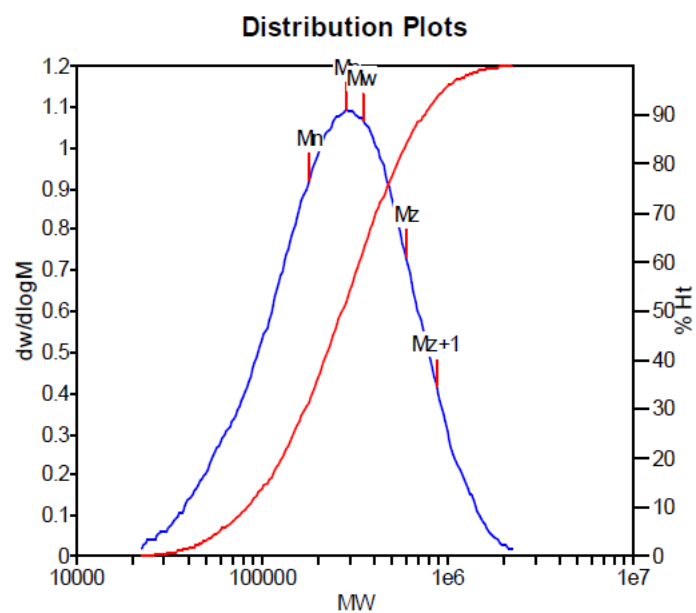

**MW Averages**

| Peak No | Mp     | Mn     | Mw     | Mz     | Mz+1   | Mv     | PD      |
|---------|--------|--------|--------|--------|--------|--------|---------|
| 1       | 281952 | 178229 | 352701 | 599441 | 873226 | 319172 | 1.97892 |

**Figure S35. Table 1, entry 3**

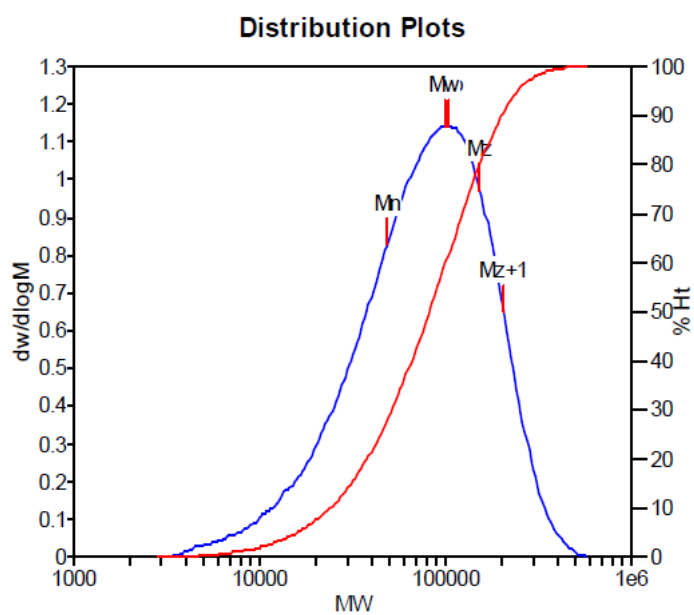

**MW Averages**

| Peak No | Mp     | Mn    | Mw    | Mz     | Mz+1   | Mv    | PD      |
|---------|--------|-------|-------|--------|--------|-------|---------|
| 1       | 103575 | 49072 | 99115 | 153735 | 206112 | 90803 | 2.01979 |

**Figure S36. Table 1, entry 4**

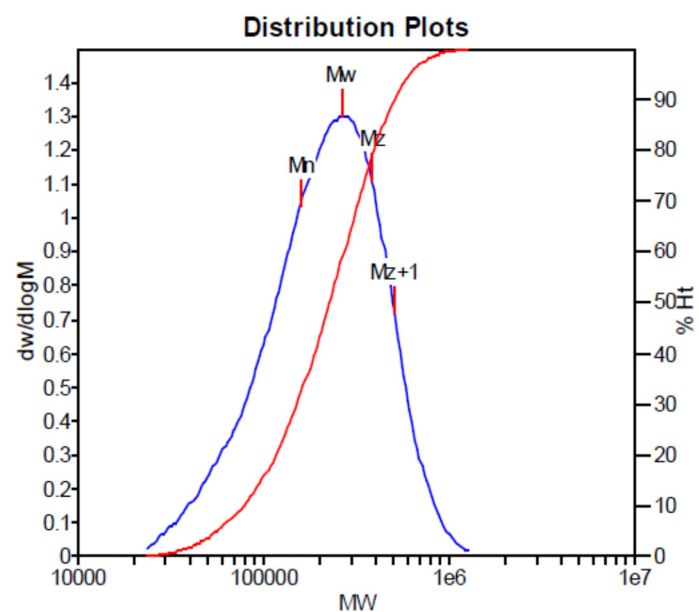

**MW Averages**

| Peak No | Mp     | Mn     | Mw     | Mz     | Mz+1   | Mv     | PD      |
|---------|--------|--------|--------|--------|--------|--------|---------|
| 1       | 268497 | 158890 | 264699 | 384971 | 506416 | 246522 | 1.66593 |

Figure S37. Table 2, entry 1

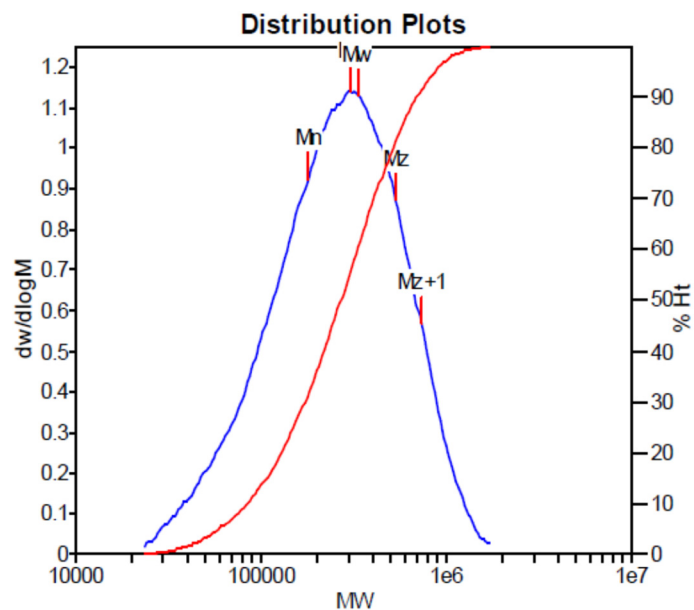

**MW Averages**

| Peak No | Mp     | Mn     | Mw     | Mz     | Mz+1   | Mv     | PD     |
|---------|--------|--------|--------|--------|--------|--------|--------|
| 1       | 303411 | 179390 | 337378 | 534771 | 732226 | 308684 | 1.8807 |

Figure S38. Table 2, entry 2

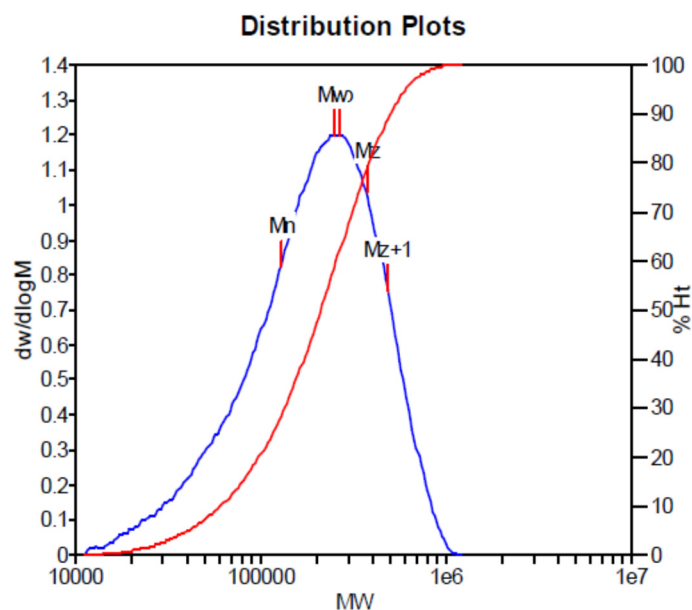

**MW Averages**

| Peak No | Mp     | Mn     | Mw     | Mz     | Mz+1   | Mv     | PD      |
|---------|--------|--------|--------|--------|--------|--------|---------|
| 1       | 268608 | 127844 | 248979 | 373664 | 483550 | 229277 | 1.94752 |

**Figure S39. Table 2, entry 3**

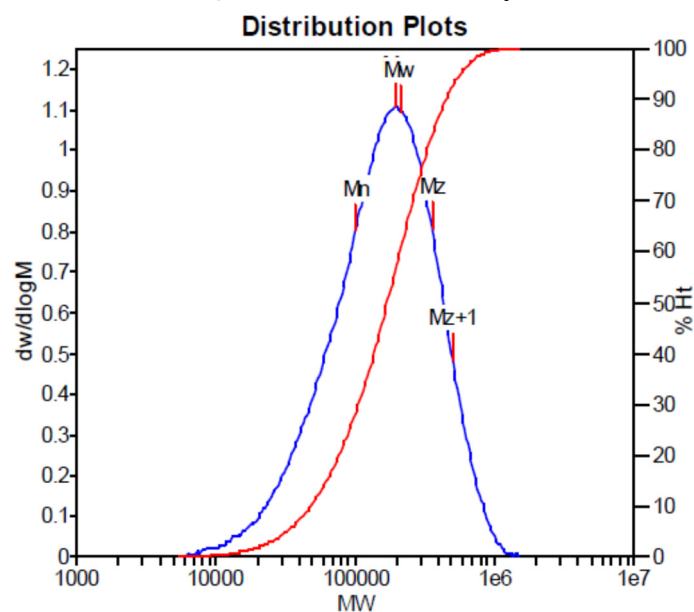

**MW Averages**

| Peak No | Mp     | Mn     | Mw     | Mz     | Mz+1   | Mv     | PD      |
|---------|--------|--------|--------|--------|--------|--------|---------|
| 1       | 195508 | 101380 | 216299 | 357740 | 504813 | 196013 | 2.13355 |

**Figure S40. Table 2, entry 4**



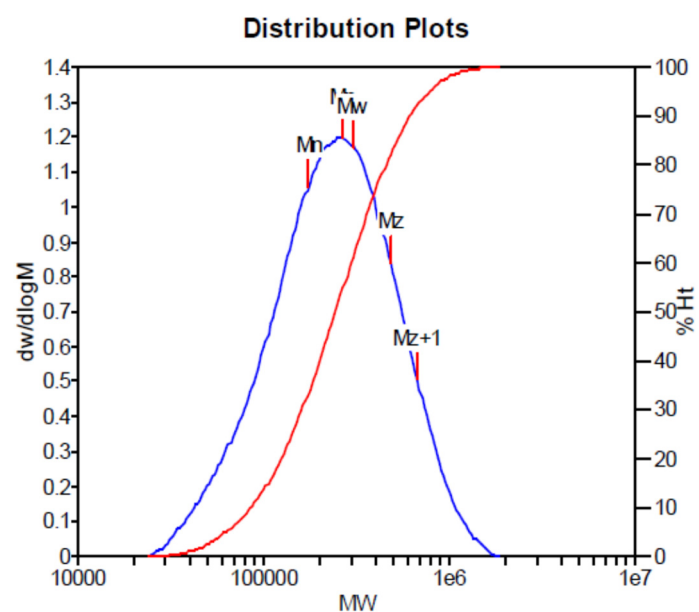

**MW Averages**

| Peak No | Mp     | Mn     | Mw     | Mz     | Mz+1   | Mv     | PD      |
|---------|--------|--------|--------|--------|--------|--------|---------|
| 1       | 268497 | 174702 | 305231 | 480936 | 673967 | 280674 | 1.74715 |

**Figure S41. Table 2, entry 5**

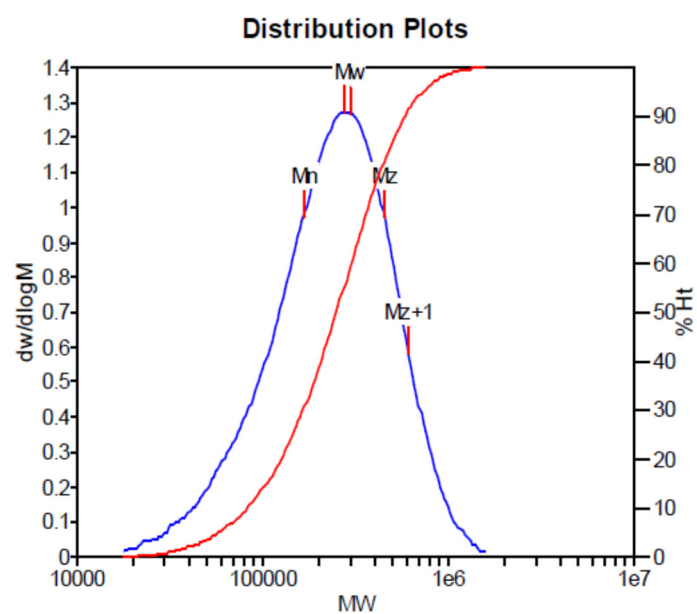

**MW Averages**

| Peak No | Mp     | Mn     | Mw     | Mz     | Mz+1   | Mv     | PD      |
|---------|--------|--------|--------|--------|--------|--------|---------|
| 1       | 275142 | 166754 | 297825 | 451728 | 614476 | 275227 | 1.78601 |

**Figure S42. Table 2, entry 6**

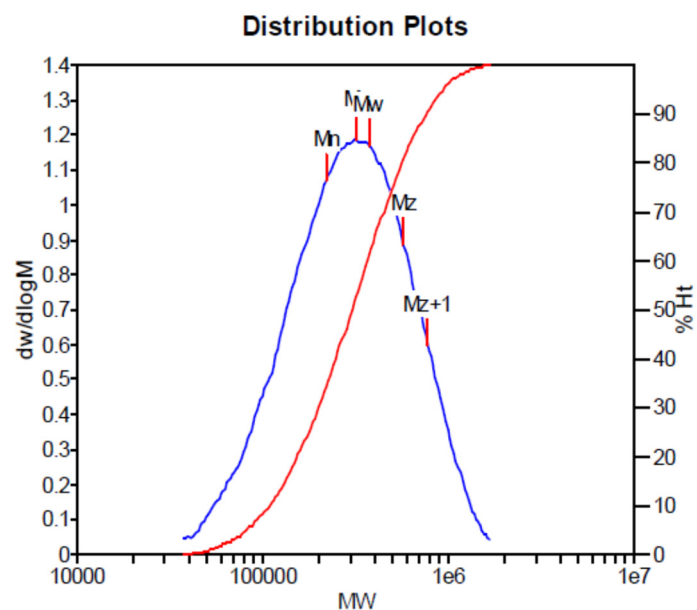

**MW Averages**

| Peak No | Mp     | Mn     | Mw     | Mz     | Mz+1   | Mv     | PD      |
|---------|--------|--------|--------|--------|--------|--------|---------|
| 1       | 318617 | 219994 | 374069 | 571875 | 770984 | 345446 | 1.70036 |

Figure S43. Table 2, entry 7

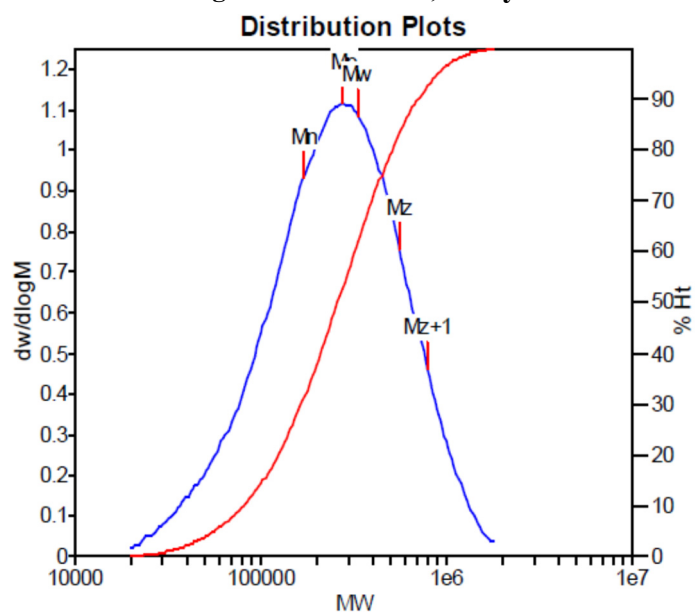

**MW Averages**

| Peak No | Mp     | Mn     | Mw     | Mz     | Mz+1   | Mv     | PD      |
|---------|--------|--------|--------|--------|--------|--------|---------|
| 1       | 275142 | 170785 | 335723 | 557006 | 789748 | 304850 | 1.96576 |

Figure S44. Table 2, entry 8

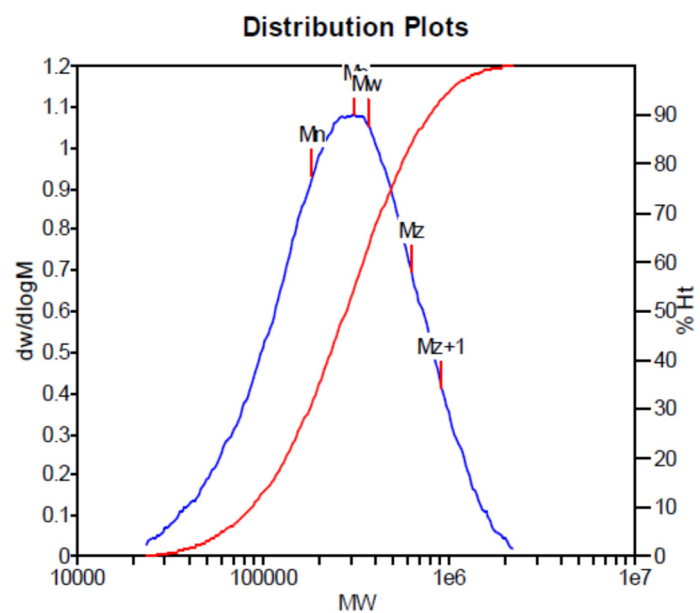

**MW Averages**

| Peak No | Mp     | Mn     | Mw     | Mz     | Mz+1   | Mv     | PD      |
|---------|--------|--------|--------|--------|--------|--------|---------|
| 1       | 310921 | 184561 | 369208 | 633248 | 920706 | 333455 | 2.00047 |

**Figure S45. Table 2, entry 9**

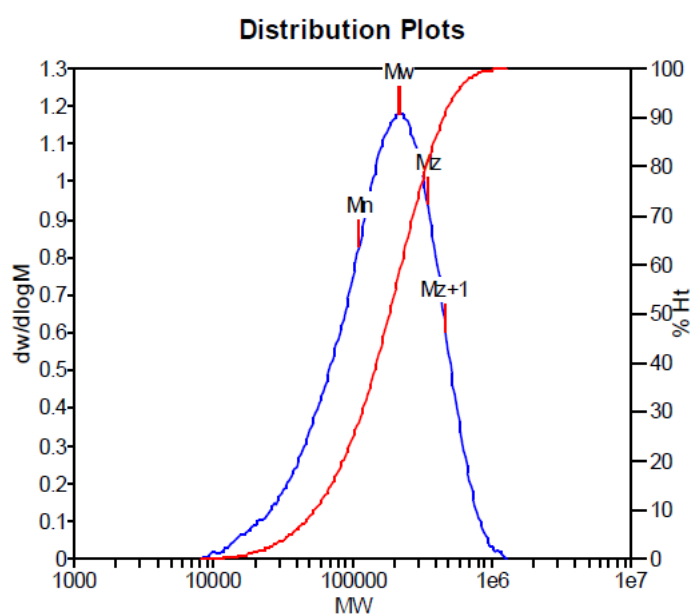

**MW Averages**

| Peak No | Mp     | Mn     | Mw     | Mz     | Mz+1   | Mv     | PD      |
|---------|--------|--------|--------|--------|--------|--------|---------|
| 1       | 215582 | 112212 | 223114 | 347396 | 470074 | 204432 | 1.98833 |

**Figure S46. Table 3, entry 1**

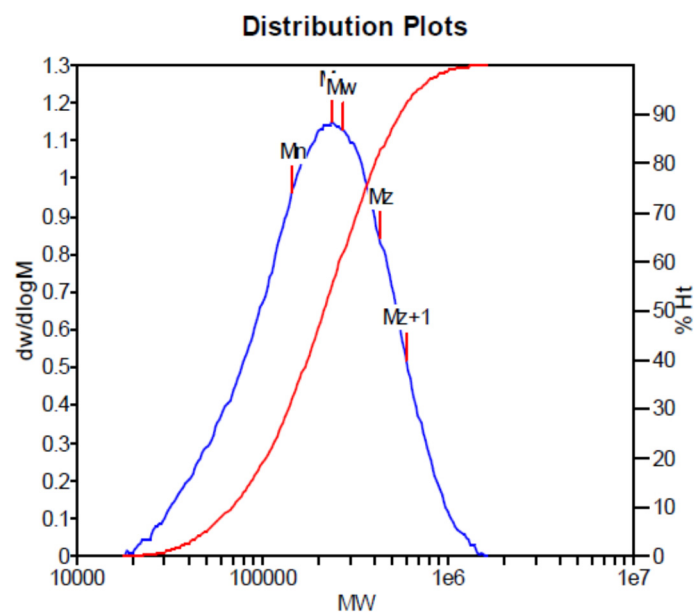

**MW Averages**

| Peak No | Mp     | Mn     | Mw     | Mz     | Mz+1   | Mv     | PD      |
|---------|--------|--------|--------|--------|--------|--------|---------|
| 1       | 237717 | 145060 | 268928 | 429344 | 598441 | 246084 | 1.85391 |

**Figure S47. Table 3, entry 2**

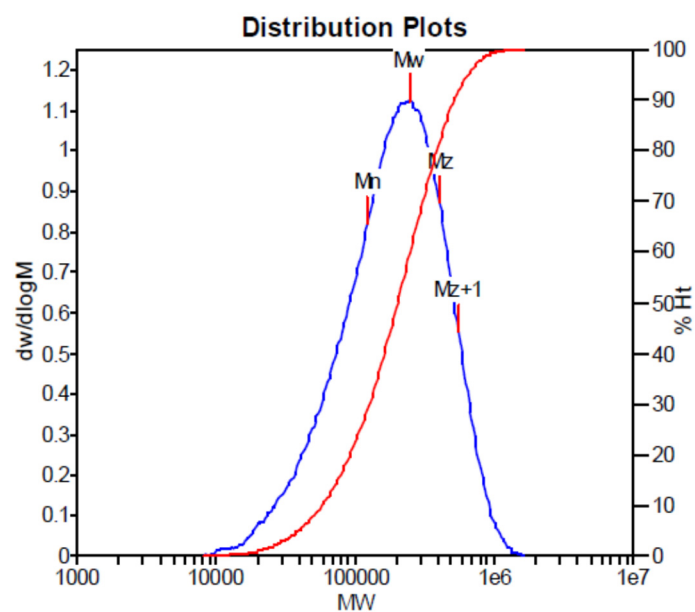

**MW Averages**

| Peak No | Mp     | Mn     | Mw     | Mz     | Mz+1   | Mv     | PD      |
|---------|--------|--------|--------|--------|--------|--------|---------|
| 1       | 249622 | 123575 | 252569 | 405364 | 558367 | 230086 | 2.04385 |

**Figure S48. Table 3, entry 3**
